# Supplementary material for: Development cycle 2 of the Modular Earth Submodel System (MESSy2)
Source: Copernicus journal article supplement (doi:10.5194/gmd-3-717-2010), 2010-12-22
Supplement: Supplementary file 1 [file gmd-3-717-2010-supplement.zip]

Archive with 5 entries (5 files):
- MESSy2_channel_manual.pdf
- MESSy2_evaluation.pdf
- MESSy2_mecca.pdf
- MESSy2_scav.pdf
- MESSy2_timer_manual.pdf
