# Supplementary material for: Development cycle 2 of the Modular Earth Submodel System (MESSy2)
Source: Copernicus journal article supplement (doi:10.5194/gmd-3-717-2010), 2010-12-22
Supplement: Supplementary file 1 [file gmd-3-717-2010-supplement.zip › MESSy2_mecca.pdf]

# The Chemical Mechanism of MECCA

*as applied for the  
evaluation of development cycle 2 of MESSy*

Patrick Jöckel<sup>1,2</sup>, Astrid Kerkweg<sup>3</sup>,  
Andrea Pozzer<sup>4</sup>, Rolf Sander<sup>1</sup>, Holger Tost<sup>1</sup>,  
Hella Riede<sup>1</sup>, Andreas Baumgaertner<sup>1</sup>,  
Sergey Gromov<sup>1</sup>, Bastian Kern<sup>1</sup>

<sup>1</sup> Air Chemistry Department, Max-Planck Institute of Chemistry, PO  
Box 3060, 55020 Mainz, Germany

<sup>2</sup> Deutsches Zentrum für Luft- und Raumfahrt, Institut für Physik der  
Atmosphäre, Oberpfaffenhofen, 82230 Wessling, Germany

<sup>3</sup> Institute for Atmospheric Physics, University Mainz, 55128 Mainz,  
Germany

<sup>4</sup> Cyprus Institute, EEWRC, P.O. Box 27456, 1645 Nicosia, Cyprus  
Patrick.Joeckel@dlr.de

# The Chemical Mechanism of MECCA

KPP version: 2.2.1\_rs3

MECCA version: 2.5c2

Date: November 28, 2010.

Selected reactions:

“(Tr && (G || Het) && !I) || St)”

Number of aerosol phases: 0

Number of species in selected mechanism:

Gas phase: 134

Aqueous phase: 0

All species: 134

Number of reactions in selected mechanism:

Gas phase (Gnnn): 228

Aqueous phase (Annn): 0

Henry (Hnnn): 0

Photolysis (Jnnn): 70

Heterogeneous (HETnnn): 22

Equilibria (EQnn): 0

Dummy (Dnn): 0

All equations: 320

Further information can be found in the article “Technical Note:  
The new comprehensive atmospheric chemistry module MECCA” by  
R. Sander et al. (Atmos. Chem. Phys. **5**, 445-450, 2005), available at  
<http://www.atmos-chem-phys.net/5/445>.

Table 1: Gas phase reactions

| #      | labels | reaction                                       | rate coefficient                                      | reference                                                |
|--------|--------|------------------------------------------------|-------------------------------------------------------|----------------------------------------------------------|
| G1000  | StTrG  | $O_2 + O(^1D) \rightarrow O(^3P) + O_2$        | $3.3E-11*EXP(55./temp)$                               | Sander et al. (2006)                                     |
| G1001  | StTrG  | $O_2 + O(^3P) \rightarrow O_3$                 | $6.E-34*((temp/300.)**(-2.4))*cair$                   | Sander et al. (2006)                                     |
| G1002  | StG    | $O_3 + O(^1D) \rightarrow 2 O_2$               | $1.2E-10$                                             | Sander et al. (2006)*                                    |
| G1003  | StG    | $O_3 + O(^3P) \rightarrow 2 O_2$               | $8.E-12*EXP(-2060./temp)$                             | Sander et al. (2006)                                     |
| G2100  | StTrG  | $H + O_2 \rightarrow HO_2$                     | $k\_3rd(temp, cair, 4.4E-32, 1.3, 4.7E-11, 0.2, 0.6)$ | Sander et al. (2006)                                     |
| G2101  | StG    | $H + O_3 \rightarrow OH + O_2$                 | $1.4E-10*EXP(-470./temp)$                             | Sander et al. (2006)                                     |
| G2102  | StG    | $H_2 + O(^1D) \rightarrow H + OH$              | $1.1E-10$                                             | Sander et al. (2006)                                     |
| G2103  | StG    | $OH + O(^3P) \rightarrow H + O_2$              | $2.2E-11*EXP(120./temp)$                              | Sander et al. (2006)                                     |
| G2104  | StTrG  | $OH + O_3 \rightarrow LossOH + HO_2 + O_2$     | $1.7E-12*EXP(-940./temp)$                             | Sander et al. (2006)                                     |
| G2105  | StTrG  | $OH + H_2 \rightarrow H_2O + H$                | $2.8E-12*EXP(-1800./temp)$                            | Sander et al. (2006)                                     |
| G2106  | StG    | $HO_2 + O(^3P) \rightarrow OH + O_2$           | $3.E-11*EXP(200./temp)$                               | Sander et al. (2006)                                     |
| G2107  | StTrG  | $HO_2 + O_3 \rightarrow LossHO_2 + OH + 2 O_2$ | $1.E-14*EXP(-490./temp)$                              | Sander et al. (2006)                                     |
| G2108a | StG    | $HO_2 + H \rightarrow 2 OH$                    | $7.2E-11$                                             | Sander et al. (2006)                                     |
| G2108b | StG    | $HO_2 + H \rightarrow H_2 + O_2$               | $6.9E-12$                                             | Sander et al. (2006)                                     |
| G2108c | StG    | $HO_2 + H \rightarrow O(^3P) + H_2O$           | $1.6E-12$                                             | Sander et al. (2006)                                     |
| G2109  | StTrG  | $HO_2 + OH \rightarrow H_2O + O_2$             | $4.8E-11*EXP(250./temp)$                              | Sander et al. (2006)                                     |
| G2110  | StTrG  | $HO_2 + HO_2 \rightarrow H_2O_2 + O_2$         | $k\_HO2\_HO2$                                         | Christensen et al. (2002),<br>Kircher and Sander (1984)* |
| G2111  | StTrG  | $H_2O + O(^1D) \rightarrow LossO1D + 2 OH$     | $1.63E-10*EXP(60./temp)$                              | Sander et al. (2006)                                     |
| G2112  | StTrG  | $H_2O_2 + OH \rightarrow H_2O + HO_2$          | $1.8E-12$                                             | Sander et al. (2006)                                     |
| G3100  | StGN   | $N + O_2 \rightarrow NO + O(^3P)$              | $1.5E-11*EXP(-3600./temp)$                            | Sander et al. (2006)                                     |
| G3101  | StTrG  | $N_2 + O(^1D) \rightarrow O(^3P) + N_2$        | $2.15E-11*EXP(110./temp)$                             | Sander et al. (2006)                                     |
| G3102a | StGN   | $N_2O + O(^1D) \rightarrow 2 NO$               | $6.7E-11*EXP(20./temp)$                               | Sander et al. (2006)                                     |
| G3102b | StGN   | $N_2O + O(^1D) \rightarrow N_2 + O_2$          | $4.7E-11*EXP(20./temp)$                               | Sander et al. (2006)                                     |
| G3103  | StTrGN | $NO + O_3 \rightarrow NO_2 + O_2$              | $3.E-12*EXP(-1500./temp)$                             | Sander et al. (2006)                                     |
| G3104  | StGN   | $NO + N \rightarrow O(^3P) + N_2$              | $2.1E-11*EXP(100./temp)$                              | Sander et al. (2006)                                     |
| G3105  | StGN   | $NO_2 + O(^3P) \rightarrow NO + O_2$           | $5.1E-12*EXP(210./temp)$                              | Sander et al. (2006)                                     |
| G3106  | StTrGN | $NO_2 + O_3 \rightarrow NO_3 + O_2$            | $1.2E-13*EXP(-2450./temp)$                            | Sander et al. (2006)                                     |
| G3107  | StGN   | $NO_2 + N \rightarrow N_2O + O(^3P)$           | $5.8E-12*EXP(220./temp)$                              | Sander et al. (2006)                                     |
| G3108  | StTrGN | $NO_3 + NO \rightarrow 2 NO_2$                 | $1.5E-11*EXP(170./temp)$                              | Sander et al. (2006)                                     |
| G3109  | StTrGN | $NO_3 + NO_2 \rightarrow N_2O_5$               | $k\_NO3\_NO2$                                         | Sander et al. (2006)*                                    |
| G3110  | StTrGN | $N_2O_5 \rightarrow NO_2 + NO_3$               | $k\_NO3\_NO2/(2.7E-27*EXP(11000./temp))$              | Sander et al. (2006)*                                    |

Table 1: Gas phase reactions (... continued)

| #     | labels | reaction                                                                                                                                    | rate coefficient                                                                          | reference                 |
|-------|--------|---------------------------------------------------------------------------------------------------------------------------------------------|-------------------------------------------------------------------------------------------|---------------------------|
| G3200 | TrG    | $\text{NO} + \text{OH} \rightarrow \text{HONO}$                                                                                             | $k_{\text{3rd}}(\text{temp}, \text{cair}, 7.0\text{E-}31, 2.6, 3.6\text{E-}11, 0.1, 0.6)$ | Sander et al. (2006)      |
| G3201 | StTrGN | $\text{NO} + \text{HO}_2 \rightarrow \text{ProdHO2} + \text{NO}_2 + \text{OH}$                                                              | $3.5\text{E-}12 \cdot \text{EXP}(250./\text{temp})$                                       | Sander et al. (2006)      |
| G3202 | StTrGN | $\text{NO}_2 + \text{OH} \rightarrow \text{HNO}_3$                                                                                          | $k_{\text{3rd}}(\text{temp}, \text{cair}, 1.8\text{E-}30, 3.0, 2.8\text{E-}11, 0., 0.6)$  | Sander et al. (2006)      |
| G3203 | StTrGN | $\text{NO}_2 + \text{HO}_2 \rightarrow \text{HNO}_4$                                                                                        | $k_{\text{NO2\_HO2}}$                                                                     | Sander et al. (2006)*     |
| G3204 | TrGN   | $\text{NO}_3 + \text{HO}_2 \rightarrow \text{NO}_2 + \text{OH} + \text{O}_2$                                                                | $3.5\text{E-}12$                                                                          | Sander et al. (2006)      |
| G3205 | TrG    | $\text{HONO} + \text{OH} \rightarrow \text{NO}_2 + \text{H}_2\text{O}$                                                                      | $1.8\text{E-}11 \cdot \text{EXP}(-390./\text{temp})$                                      | Sander et al. (2006)      |
| G3206 | StTrGN | $\text{HNO}_3 + \text{OH} \rightarrow \text{H}_2\text{O} + \text{NO}_3$                                                                     | $k_{\text{HNO3\_OH}}$                                                                     | Sander et al. (2006)*     |
| G3207 | StTrGN | $\text{HNO}_4 \rightarrow \text{NO}_2 + \text{HO}_2$                                                                                        | $k_{\text{NO2\_HO2}} / (2.1\text{E-}27 \cdot \text{EXP}(10900./\text{temp}))$             | Sander et al. (2006)*     |
| G3208 | StTrGN | $\text{HNO}_4 + \text{OH} \rightarrow \text{NO}_2 + \text{H}_2\text{O}$                                                                     | $1.3\text{E-}12 \cdot \text{EXP}(380./\text{temp})$                                       | Sander et al. (2006)      |
| G3209 | TrGN   | $\text{NH}_3 + \text{OH} \rightarrow \text{NH}_2 + \text{H}_2\text{O}$                                                                      | $1.7\text{E-}12 \cdot \text{EXP}(-710./\text{temp})$                                      | Kohlmann and Poppe (1999) |
| G3210 | TrGN   | $\text{NH}_2 + \text{O}_3 \rightarrow \text{NH}_2\text{O} + \text{O}_2$                                                                     | $4.3\text{E-}12 \cdot \text{EXP}(-930./\text{temp})$                                      | Kohlmann and Poppe (1999) |
| G3211 | TrGN   | $\text{NH}_2 + \text{HO}_2 \rightarrow \text{NH}_2\text{O} + \text{OH}$                                                                     | $4.8\text{E-}07 \cdot \text{EXP}(-628./\text{temp}) \cdot \text{temp}^{**}(-1.32)$        | Kohlmann and Poppe (1999) |
| G3212 | TrGN   | $\text{NH}_2 + \text{HO}_2 \rightarrow \text{HNO} + \text{H}_2\text{O}$                                                                     | $9.4\text{E-}09 \cdot \text{EXP}(-356./\text{temp}) \cdot \text{temp}^{**}(-1.12)$        | Kohlmann and Poppe (1999) |
| G3213 | TrGN   | $\text{NH}_2 + \text{NO} \rightarrow \text{HO}_2 + \text{OH} + \text{N}_2$                                                                  | $1.92\text{E-}12 \cdot ((\text{temp}/298.)^{**}(-1.5))$                                   | Kohlmann and Poppe (1999) |
| G3214 | TrGN   | $\text{NH}_2 + \text{NO} \rightarrow \text{N}_2 + \text{H}_2\text{O}$                                                                       | $1.41\text{E-}11 \cdot ((\text{temp}/298.)^{**}(-1.5))$                                   | Kohlmann and Poppe (1999) |
| G3215 | TrGN   | $\text{NH}_2 + \text{NO}_2 \rightarrow \text{N}_2\text{O} + \text{H}_2\text{O}$                                                             | $1.2\text{E-}11 \cdot ((\text{temp}/298.)^{**}(-2.0))$                                    | Kohlmann and Poppe (1999) |
| G3216 | TrGN   | $\text{NH}_2 + \text{NO}_2 \rightarrow \text{NH}_2\text{O} + \text{NO}$                                                                     | $0.8\text{E-}11 \cdot ((\text{temp}/298.)^{**}(-2.0))$                                    | Kohlmann and Poppe (1999) |
| G3217 | TrGN   | $\text{NH}_2\text{O} + \text{O}_3 \rightarrow \text{NH}_2 + \text{O}_2$                                                                     | $1.2\text{E-}14$                                                                          | Kohlmann and Poppe (1999) |
| G3218 | TrGN   | $\text{NH}_2\text{O} \rightarrow \text{NHOH}$                                                                                               | $1.3\text{E+}3$                                                                           | Kohlmann and Poppe (1999) |
| G3219 | TrGN   | $\text{HNO} + \text{OH} \rightarrow \text{NO} + \text{H}_2\text{O}$                                                                         | $8.0\text{E-}11 \cdot \text{EXP}(-500./\text{temp})$                                      | Kohlmann and Poppe (1999) |
| G3220 | TrGN   | $\text{HNO} + \text{NHOH} \rightarrow \text{NH}_2\text{OH} + \text{NO}$                                                                     | $1.66\text{E-}12 \cdot \text{EXP}(-1500./\text{temp})$                                    | Kohlmann and Poppe (1999) |
| G3221 | TrGN   | $\text{HNO} + \text{NO}_2 \rightarrow \text{HONO} + \text{NO}$                                                                              | $1.0\text{E-}12 \cdot \text{EXP}(-1000./\text{temp})$                                     | Kohlmann and Poppe (1999) |
| G3222 | TrGN   | $\text{NHOH} + \text{OH} \rightarrow \text{HNO} + \text{H}_2\text{O}$                                                                       | $1.66\text{E-}12$                                                                         | Kohlmann and Poppe (1999) |
| G3223 | TrGN   | $\text{NH}_2\text{OH} + \text{OH} \rightarrow \text{NHOH} + \text{H}_2\text{O}$                                                             | $4.13\text{E-}11 \cdot \text{EXP}(-2138./\text{temp})$                                    | Kohlmann and Poppe (1999) |
| G3224 | TrGN   | $\text{HNO} + \text{O}_2 \rightarrow \text{HO}_2 + \text{NO}$                                                                               | $3.65\text{E-}14 \cdot \text{EXP}(-4600./\text{temp})$                                    | Kohlmann and Poppe (1999) |
| G4100 | StG    | $\text{CH}_4 + \text{O}(^1\text{D}) \rightarrow .75 \text{CH}_3\text{O}_2 + .75 \text{OH} + .25 \text{HCHO} + .4 \text{H} + .05 \text{H}_2$ | $1.5\text{E-}10$                                                                          | Sander et al. (2006)      |
| G4101 | StTrG  | $\text{CH}_4 + \text{OH} \rightarrow \text{CH}_3\text{O}_2 + \text{H}_2\text{O}$                                                            | $1.85\text{E-}20 \cdot \text{EXP}(2.82 \cdot \log(\text{temp}) - 987./\text{temp})$       | Atkinson (2003)           |
| G4102 | TrG    | $\text{CH}_3\text{OH} + \text{OH} \rightarrow \text{HCHO} + \text{HO}_2$                                                                    | $2.9\text{E-}12 \cdot \text{EXP}(-345./\text{temp})$                                      | Sander et al. (2006)      |
| G4103 | StTrG  | $\text{CH}_3\text{O}_2 + \text{HO}_2 \rightarrow \text{CH}_3\text{OOH} + \text{O}_2$                                                        | $4.1\text{E-}13 \cdot \text{EXP}(750./\text{temp})$                                       | Sander et al. (2006)*     |
| G4104 | StTrGN | $\text{CH}_3\text{O}_2 + \text{NO} \rightarrow \text{ProdMeO2} + \text{HCHO} + \text{NO}_2 + \text{HO}_2$                                   | $2.8\text{E-}12 \cdot \text{EXP}(300./\text{temp})$                                       | Sander et al. (2006)      |
| G4105 | TrGN   | $\text{CH}_3\text{O}_2 + \text{NO}_3 \rightarrow \text{HCHO} + \text{HO}_2 + \text{NO}_2$                                                   | $1.3\text{E-}12$                                                                          | Atkinson et al. (1999)    |

Table 1: Gas phase reactions (... continued)

| #      | labels | reaction                                                                                                                                                                               | rate coefficient                                                                                       | reference                                              |
|--------|--------|----------------------------------------------------------------------------------------------------------------------------------------------------------------------------------------|--------------------------------------------------------------------------------------------------------|--------------------------------------------------------|
| G4106a | StTrG  | $\text{CH}_3\text{O}_2 + \text{CH}_3\text{O}_2 \rightarrow 2 \text{HCHO} + 2 \text{HO}_2$                                                                                              | $9.5\text{E-}14 \cdot \text{EXP}(390./\text{temp}) / (1.+1./26.2 \cdot \text{EXP}(1130./\text{temp}))$ | Sander et al. (2006)                                   |
| G4106b | StTrG  | $\text{CH}_3\text{O}_2 + \text{CH}_3\text{O}_2 \rightarrow \text{HCHO} + \text{CH}_3\text{OH} + \text{O}_2$                                                                            | $9.5\text{E-}14 \cdot \text{EXP}(390./\text{temp}) / (1.+26.2 \cdot \text{EXP}(-1130./\text{temp}))$   | Sander et al. (2006)                                   |
| G4107  | StTrG  | $\text{CH}_3\text{OOH} + \text{OH} \rightarrow .7 \text{CH}_3\text{O}_2 + .3 \text{HCHO} + .3 \text{OH} + \text{H}_2\text{O}$                                                          | k_CH300H_OH                                                                                            | Sander et al. (2006)*                                  |
| G4108  | StTrG  | $\text{HCHO} + \text{OH} \rightarrow \text{CO} + \text{H}_2\text{O} + \text{HO}_2$                                                                                                     | $9.52\text{E-}18 \cdot \text{EXP}(2.03 \cdot \log(\text{temp}) + 636./\text{temp})$                    | Sivakumaran et al. (2003)                              |
| G4109  | TrGN   | $\text{HCHO} + \text{NO}_3 \rightarrow \text{HNO}_3 + \text{CO} + \text{HO}_2$                                                                                                         | $3.4\text{E-}13 \cdot \text{EXP}(-1900./\text{temp})$                                                  | Sander et al. (2006)*                                  |
| G4110  | StTrG  | $\text{CO} + \text{OH} \rightarrow \text{H} + \text{CO}_2$                                                                                                                             | $1.57\text{E-}13 + \text{cair} \cdot 3.54\text{E-}33$                                                  | McCabe et al. (2001)                                   |
| G4111  | TrG    | $\text{HCOOH} + \text{OH} \rightarrow \text{HO}_2$                                                                                                                                     | $4.0\text{E-}13$                                                                                       | Sander et al. (2006)                                   |
| G4200  | TrGC   | $\text{C}_2\text{H}_6 + \text{OH} \rightarrow \text{C}_2\text{H}_5\text{O}_2 + \text{H}_2\text{O}$                                                                                     | $1.49\text{E-}17 \cdot \text{temp} \cdot \text{temp} \cdot \text{EXP}(-499./\text{temp})$              | Atkinson (2003)                                        |
| G4201  | TrGC   | $\text{C}_2\text{H}_4 + \text{O}_3 \rightarrow \text{HCHO} + .22 \text{HO}_2 + .12 \text{OH} + .23 \text{CO} + .54 \text{HCOOH} + .1 \text{H}_2$                                       | $1.2\text{E-}14 \cdot \text{EXP}(-2630./\text{temp})$                                                  | Sander et al. (2006)*                                  |
| G4202  | TrGC   | $\text{C}_2\text{H}_4 + \text{OH} \rightarrow .6666667 \text{CH}_3\text{CH}(\text{O}_2)\text{CH}_2\text{OH}$                                                                           | k_3rd(temp, cair, $1.0\text{E-}28$ , $4.5$ , $8.8\text{E-}12$ , $0.85$ , $0.6$ )                       | Sander et al. (2006)                                   |
| G4203  | TrGC   | $\text{C}_2\text{H}_5\text{O}_2 + \text{HO}_2 \rightarrow \text{C}_2\text{H}_5\text{OOH}$                                                                                              | $7.5\text{E-}13 \cdot \text{EXP}(700./\text{temp})$                                                    | Sander et al. (2006)                                   |
| G4204  | TrGNC  | $\text{C}_2\text{H}_5\text{O}_2 + \text{NO} \rightarrow \text{ProdRO}_2 + \text{CH}_3\text{CHO} + \text{HO}_2 + \text{NO}_2$                                                           | $2.6\text{E-}12 \cdot \text{EXP}(365./\text{temp})$                                                    | Sander et al. (2006)                                   |
| G4205  | TrGNC  | $\text{C}_2\text{H}_5\text{O}_2 + \text{NO}_3 \rightarrow \text{CH}_3\text{CHO} + \text{HO}_2 + \text{NO}_2$                                                                           | $2.3\text{E-}12$                                                                                       | Atkinson et al. (1999)                                 |
| G4206  | TrGC   | $\text{C}_2\text{H}_5\text{O}_2 + \text{CH}_3\text{O}_2 \rightarrow .75 \text{HCHO} + \text{HO}_2 + .75 \text{CH}_3\text{CHO} + .25 \text{CH}_3\text{OH}$                              | $1.6\text{E-}13 \cdot \text{EXP}(195./\text{temp})$                                                    | see note                                               |
| G4207  | TrGC   | $\text{C}_2\text{H}_5\text{OOH} + \text{OH} \rightarrow .3 \text{C}_2\text{H}_5\text{O}_2 + .7 \text{CH}_3\text{CHO} + .7 \text{OH}$                                                   | k_CH300H_OH                                                                                            | see note                                               |
| G4208  | TrGC   | $\text{CH}_3\text{CHO} + \text{OH} \rightarrow \text{CH}_3\text{C}(\text{O})\text{OO} + \text{H}_2\text{O}$                                                                            | $4.4\text{E-}12 \cdot \text{EXP}(365./\text{temp})$                                                    | Atkinson et al. (2006)                                 |
| G4209  | TrGNC  | $\text{CH}_3\text{CHO} + \text{NO}_3 \rightarrow \text{CH}_3\text{C}(\text{O})\text{OO} + \text{HNO}_3$                                                                                | $1.4\text{E-}12 \cdot \text{EXP}(-1900./\text{temp})$                                                  | Sander et al. (2006)                                   |
| G4210  | TrGC   | $\text{CH}_3\text{COOH} + \text{OH} \rightarrow \text{CH}_3\text{O}_2 + \text{CO}_2 + \text{H}_2\text{O}$                                                                              | $4.2\text{E-}14 \cdot \text{EXP}(855./\text{temp})$                                                    | Atkinson et al. (2006)                                 |
| G4211a | TrGC   | $\text{CH}_3\text{C}(\text{O})\text{OO} + \text{HO}_2 \rightarrow \text{CH}_3\text{C}(\text{O})\text{OOH}$                                                                             | $4.3\text{E-}13 \cdot \text{EXP}(1040./\text{temp}) / (1.+1./37. \cdot \text{EXP}(660./\text{temp}))$  | Tyndall et al. (2001)                                  |
| G4211b | TrGC   | $\text{CH}_3\text{C}(\text{O})\text{OO} + \text{HO}_2 \rightarrow \text{CH}_3\text{COOH} + \text{O}_3$                                                                                 | $4.3\text{E-}13 \cdot \text{EXP}(1040./\text{temp}) / (1.+37. \cdot \text{EXP}(-660./\text{temp}))$    | Tyndall et al. (2001)                                  |
| G4212  | TrGNC  | $\text{CH}_3\text{C}(\text{O})\text{OO} + \text{NO} \rightarrow \text{ProdRO}_2 + \text{CH}_3\text{O}_2 + \text{NO}_2$                                                                 | $8.1\text{E-}12 \cdot \text{EXP}(270./\text{temp})$                                                    | Tyndall et al. (2001)                                  |
| G4213  | TrGNC  | $\text{CH}_3\text{C}(\text{O})\text{OO} + \text{NO}_2 \rightarrow \text{PAN}$                                                                                                          | k_PA_NO2                                                                                               | Sander et al. (2006)                                   |
| G4214  | TrGNC  | $\text{CH}_3\text{C}(\text{O})\text{OO} + \text{NO}_3 \rightarrow \text{CH}_3\text{O}_2 + \text{NO}_2$                                                                                 | $4.\text{E-}12$                                                                                        | Canosa-Mas et al. (1996)                               |
| G4215a | TrGC   | $\text{CH}_3\text{C}(\text{O})\text{OO} + \text{CH}_3\text{O}_2 \rightarrow \text{HCHO} + \text{HO}_2 + \text{CH}_3\text{O}_2 + \text{CO}_2$                                           | $0.9 \cdot 2.\text{E-}12 \cdot \text{EXP}(500./\text{temp})$                                           | Sander et al. (2006)                                   |
| G4215b | TrGC   | $\text{CH}_3\text{C}(\text{O})\text{OO} + \text{CH}_3\text{O}_2 \rightarrow \text{CH}_3\text{COOH} + \text{HCHO}$                                                                      | $0.1 \cdot 2.\text{E-}12 \cdot \text{EXP}(500./\text{temp})$                                           | Sander et al. (2006)                                   |
| G4216  | TrGC   | $\text{CH}_3\text{C}(\text{O})\text{OO} + \text{C}_2\text{H}_5\text{O}_2 \rightarrow .82 \text{CH}_3\text{O}_2 + \text{CH}_3\text{CHO} + .82 \text{HO}_2 + .18 \text{CH}_3\text{COOH}$ | $4.9\text{E-}12 \cdot \text{EXP}(211./\text{temp})$                                                    | Atkinson et al. (1999), Kirchner and Stockwell (1996)* |
| G4217  | TrGC   | $\text{CH}_3\text{C}(\text{O})\text{OO} + \text{CH}_3\text{C}(\text{O})\text{OO} \rightarrow 2 \text{CH}_3\text{O}_2 + 2 \text{CO}_2 + \text{O}_2$                                     | $2.5\text{E-}12 \cdot \text{EXP}(500./\text{temp})$                                                    | Tyndall et al. (2001)                                  |

Table 1: Gas phase reactions (... continued)

| #     | labels | reaction                                                                                                                                                                                                                                                                                                                                                              | rate coefficient                                                                         | reference                     |
|-------|--------|-----------------------------------------------------------------------------------------------------------------------------------------------------------------------------------------------------------------------------------------------------------------------------------------------------------------------------------------------------------------------|------------------------------------------------------------------------------------------|-------------------------------|
| G4218 | TrGC   | $\text{CH}_3\text{C}(\text{O})\text{OOH} + \text{OH} \rightarrow \text{CH}_3\text{C}(\text{O})\text{OO}$                                                                                                                                                                                                                                                              | $k_{\text{CH300H\_OH}}$                                                                  | see note                      |
| G4219 | TrGNC  | $\text{NACA} + \text{OH} \rightarrow \text{NO}_2 + \text{HCHO} + \text{CO}$                                                                                                                                                                                                                                                                                           | $5.6\text{E-}12 \cdot \text{EXP}(270./\text{temp})$                                      | see note                      |
| G4220 | TrGNC  | $\text{PAN} + \text{OH} \rightarrow \text{HCHO} + \text{NO}_2$                                                                                                                                                                                                                                                                                                        | $2.\text{E-}14$                                                                          | see note                      |
| G4221 | TrGNC  | $\text{PAN} \rightarrow \text{CH}_3\text{C}(\text{O})\text{OO} + \text{NO}_2$                                                                                                                                                                                                                                                                                         | $k_{\text{PAN\_M}}$                                                                      | Sander et al. (2006)*         |
| G4300 | TrGC   | $\text{C}_3\text{H}_8 + \text{OH} \rightarrow .82 \text{ C}_3\text{H}_7\text{O}_2 + .18 \text{ C}_2\text{H}_5\text{O}_2 + \text{H}_2\text{O}$                                                                                                                                                                                                                         | $1.65\text{E-}17 \cdot \text{temp} \cdot \text{temp} \cdot \text{EXP}(-87./\text{temp})$ | Atkinson (2003)               |
| G4301 | TrGC   | $\text{C}_3\text{H}_6 + \text{O}_3 \rightarrow .57 \text{ HCHO} + .47 \text{ CH}_3\text{CHO} + .33 \text{ OH} + .26 \text{ HO}_2 + .07 \text{ CH}_3\text{O}_2 + .06 \text{ C}_2\text{H}_5\text{O}_2 + .23 \text{ CH}_3\text{C}(\text{O})\text{OO} + .04 \text{ CH}_3\text{COCHO} + .06 \text{ CH}_4 + .31 \text{ CO} + .22 \text{ HCOOH} + .03 \text{ CH}_3\text{OH}$ | $6.5\text{E-}15 \cdot \text{EXP}(-1900./\text{temp})$                                    | Sander et al. (2006)*         |
| G4302 | TrGC   | $\text{C}_3\text{H}_6 + \text{OH} \rightarrow \text{CH}_3\text{CH}(\text{O}_2)\text{CH}_2\text{OH}$                                                                                                                                                                                                                                                                   | $k_{\text{3rd}}(\text{temp}, \text{cair}, 8.\text{E-}27, 3.5, 3.\text{E-}11, 0., 0.5)$   | Atkinson et al. (1999)        |
| G4303 | TrGNC  | $\text{C}_3\text{H}_6 + \text{NO}_3 \rightarrow \text{ONIT}$                                                                                                                                                                                                                                                                                                          | $4.6\text{E-}13 \cdot \text{EXP}(-1155./\text{temp})$                                    | Atkinson et al. (1999)        |
| G4304 | TrGC   | $\text{C}_3\text{H}_7\text{O}_2 + \text{HO}_2 \rightarrow \text{C}_3\text{H}_7\text{OOH}$                                                                                                                                                                                                                                                                             | $k_{\text{PrO2\_HO2}}$                                                                   | Atkinson (1997)*              |
| G4305 | TrGNC  | $\text{C}_3\text{H}_7\text{O}_2 + \text{NO} \rightarrow 0.96 \text{ ProdRO2} + .96 \text{ CH}_3\text{COCH}_3 + .96 \text{ HO}_2 + .96 \text{ NO}_2 + .04 \text{ C}_3\text{H}_7\text{ONO}_2$                                                                                                                                                                           | $k_{\text{PrO2\_NO}}$                                                                    | Atkinson et al. (1999)*       |
| G4306 | TrGC   | $\text{C}_3\text{H}_7\text{O}_2 + \text{CH}_3\text{O}_2 \rightarrow \text{CH}_3\text{COCH}_3 + .8 \text{ HCHO} + .8 \text{ HO}_2 + .2 \text{ CH}_3\text{OH}$                                                                                                                                                                                                          | $k_{\text{PrO2\_CH3O2}}$                                                                 | Kirchner and Stockwell (1996) |
| G4307 | TrGC   | $\text{C}_3\text{H}_7\text{OOH} + \text{OH} \rightarrow .3 \text{ C}_3\text{H}_7\text{O}_2 + .7 \text{ CH}_3\text{COCH}_3 + .7 \text{ OH}$                                                                                                                                                                                                                            | $k_{\text{CH300H\_OH}}$                                                                  | see note                      |
| G4308 | TrGC   | $\text{CH}_3\text{CH}(\text{O}_2)\text{CH}_2\text{OH} + \text{HO}_2 \rightarrow \text{CH}_3\text{CH}(\text{OOH})\text{CH}_2\text{OH}$                                                                                                                                                                                                                                 | $6.5\text{E-}13 \cdot \text{EXP}(650./\text{temp})$                                      | Müller and Brasseur (1995)    |
| G4309 | TrGNC  | $\text{CH}_3\text{CH}(\text{O}_2)\text{CH}_2\text{OH} + \text{NO} \rightarrow 0.98 \text{ ProdRO2} + .98 \text{ CH}_3\text{CHO} + .98 \text{ HCHO} + .98 \text{ HO}_2 + .98 \text{ NO}_2 + .02 \text{ ONIT}$                                                                                                                                                          | $4.2\text{E-}12 \cdot \text{EXP}(180./\text{temp})$                                      | Müller and Brasseur (1995)*   |
| G4310 | TrGC   | $\text{CH}_3\text{CH}(\text{OOH})\text{CH}_2\text{OH} + \text{OH} \rightarrow .5 \text{ CH}_3\text{CH}(\text{O}_2)\text{CH}_2\text{OH} + .5 \text{ CH}_3\text{COCH}_2\text{OH} + .5 \text{ OH} + \text{H}_2\text{O}$                                                                                                                                                  | $3.8\text{E-}12 \cdot \text{EXP}(200./\text{temp})$                                      | Müller and Brasseur (1995)    |
| G4311 | TrGC   | $\text{CH}_3\text{COCH}_3 + \text{OH} \rightarrow \text{CH}_3\text{COCH}_2\text{O}_2 + \text{H}_2\text{O}$                                                                                                                                                                                                                                                            | $1.33\text{E-}13 + 3.82\text{E-}11 \cdot \text{EXP}(-2000./\text{temp})$                 | Sander et al. (2006)          |
| G4312 | TrGC   | $\text{CH}_3\text{COCH}_2\text{O}_2 + \text{HO}_2 \rightarrow \text{CH}_3\text{COCH}_2\text{O}_2\text{H}$                                                                                                                                                                                                                                                             | $8.6\text{E-}13 \cdot \text{EXP}(700./\text{temp})$                                      | Tyndall et al. (2001)         |
| G4313 | TrGNC  | $\text{CH}_3\text{COCH}_2\text{O}_2 + \text{NO} \rightarrow \text{ProdRO2} + \text{NO}_2 + \text{CH}_3\text{C}(\text{O})\text{OO} + \text{HCHO}$                                                                                                                                                                                                                      | $2.9\text{E-}12 \cdot \text{EXP}(300./\text{temp})$                                      | Sander et al. (2006)          |
| G4314 | TrGC   | $\text{CH}_3\text{COCH}_2\text{O}_2 + \text{CH}_3\text{O}_2 \rightarrow .5 \text{ CH}_3\text{COCHO} + .5 \text{ CH}_3\text{OH} + .3 \text{ CH}_3\text{C}(\text{O})\text{OO} + .8 \text{ HCHO} + .3 \text{ HO}_2 + .2 \text{ CH}_3\text{COCH}_2\text{OH}$                                                                                                              | $7.5\text{E-}13 \cdot \text{EXP}(500./\text{temp})$                                      | Tyndall et al. (2001)         |
| G4315 | TrGC   | $\text{CH}_3\text{COCH}_2\text{O}_2\text{H} + \text{OH} \rightarrow .3 \text{ CH}_3\text{COCH}_2\text{O}_2 + .7 \text{ CH}_3\text{COCHO} + .7 \text{ OH}$                                                                                                                                                                                                             | $k_{\text{CH300H\_OH}}$                                                                  | see note                      |
| G4316 | TrGC   | $\text{CH}_3\text{COCH}_2\text{OH} + \text{OH} \rightarrow \text{CH}_3\text{COCHO} + \text{HO}_2$                                                                                                                                                                                                                                                                     | $2.15\text{E-}12 \cdot \text{EXP}(305./\text{temp})$                                     | Dillon et al. (2006)          |
| G4317 | TrGC   | $\text{CH}_3\text{COCHO} + \text{OH} \rightarrow \text{CH}_3\text{C}(\text{O})\text{OO} + \text{CO}$                                                                                                                                                                                                                                                                  | $8.4\text{E-}13 \cdot \text{EXP}(830./\text{temp})$                                      | Tyndall et al. (1995)         |
| G4318 | TrGNC  | $\text{MPAN} + \text{OH} \rightarrow \text{CH}_3\text{COCH}_2\text{OH} + \text{NO}_2$                                                                                                                                                                                                                                                                                 | $3.2\text{E-}11$                                                                         | Orlando et al. (2002)         |

Table 1: Gas phase reactions (... continued)

| #     | labels | reaction                                                                                                                                                                                                                                                      | rate coefficient                                                                                                         | reference               |
|-------|--------|---------------------------------------------------------------------------------------------------------------------------------------------------------------------------------------------------------------------------------------------------------------|--------------------------------------------------------------------------------------------------------------------------|-------------------------|
| G4319 | TrGNC  | $\text{MPAN} \rightarrow \text{MVKO2} + \text{NO}_2$                                                                                                                                                                                                          | $k_{\text{PAN\_M}}$                                                                                                      | see note                |
| G4320 | TrGNC  | $\text{C}_3\text{H}_7\text{ONO}_2 + \text{OH} \rightarrow \text{CH}_3\text{COCH}_3 + \text{NO}_2$                                                                                                                                                             | $6.2\text{E-}13 \cdot \text{EXP}(-230./\text{temp})$                                                                     | Atkinson et al. (1999)  |
| G4400 | TrGC   | $\text{C}_4\text{H}_{10} + \text{OH} \rightarrow \text{C}_4\text{H}_9\text{O}_2 + \text{H}_2\text{O}$                                                                                                                                                         | $1.81\text{E-}17 \cdot \text{temp} \cdot \text{temp} \cdot \text{EXP}(114./\text{temp})$                                 | Atkinson (2003)         |
| G4401 | TrGC   | $\text{C}_4\text{H}_9\text{O}_2 + \text{CH}_3\text{O}_2 \rightarrow .88 \text{ CH}_3\text{COC}_2\text{H}_5 + .68 \text{ HCHO} + 1.23 \text{ HO}_2 + .12 \text{ CH}_3\text{CHO} + .12 \text{ C}_2\text{H}_5\text{O}_2 + .18 \text{ CH}_3\text{OH}$             | $k_{\text{Pr02\_CH302}}$                                                                                                 | see note                |
| G4402 | TrGC   | $\text{C}_4\text{H}_9\text{O}_2 + \text{HO}_2 \rightarrow \text{C}_4\text{H}_9\text{OOH}$                                                                                                                                                                     | $k_{\text{Pr02\_H02}}$                                                                                                   | see note                |
| G4403 | TrGNC  | $\text{C}_4\text{H}_9\text{O}_2 + \text{NO} \rightarrow \text{ProdRO2} + .84 \text{ NO}_2 + .56 \text{ CH}_3\text{COC}_2\text{H}_5 + .56 \text{ HO}_2 + .28 \text{ C}_2\text{H}_5\text{O}_2 + .84 \text{ CH}_3\text{CHO} + .16 \text{ ONIT}$                  | $k_{\text{Pr02\_N0}}$                                                                                                    | see note                |
| G4404 | TrGC   | $\text{C}_4\text{H}_9\text{OOH} + \text{OH} \rightarrow .15 \text{ C}_4\text{H}_9\text{O}_2 + .85 \text{ CH}_3\text{COC}_2\text{H}_5 + .85 \text{ OH} + .85 \text{ H}_2\text{O}$                                                                              | $k_{\text{CH300H\_OH}}$                                                                                                  | see note                |
| G4405 | TrGC   | $\text{MVK} + \text{O}_3 \rightarrow .45 \text{ HCOOH} + .9 \text{ CH}_3\text{COCHO} + .1 \text{ CH}_3\text{C(O)OO} + .19 \text{ OH} + .22 \text{ CO} + .32 \text{ HO}_2$                                                                                     | $.5 \cdot (1.36\text{E-}15 \cdot \text{EXP}(-2112./\text{temp}) + 7.51\text{E-}16 \cdot \text{EXP}(-1521./\text{temp}))$ | Pöschl et al. (2000)    |
| G4406 | TrGC   | $\text{MVK} + \text{OH} \rightarrow \text{MVKO2}$                                                                                                                                                                                                             | $.5 \cdot (4.1\text{E-}12 \cdot \text{EXP}(452./\text{temp}) + 1.9\text{E-}11 \cdot \text{EXP}(175./\text{temp}))$       | Pöschl et al. (2000)    |
| G4407 | TrGC   | $\text{MVKO2} + \text{HO}_2 \rightarrow \text{MVKOOH}$                                                                                                                                                                                                        | $1.82\text{E-}13 \cdot \text{EXP}(1300./\text{temp})$                                                                    | Pöschl et al. (2000)    |
| G4408 | TrGNC  | $\text{MVKO2} + \text{NO} \rightarrow \text{ProdRO2} + \text{NO}_2 + .25 \text{ CH}_3\text{C(O)OO} + .25 \text{ CH}_3\text{COCH}_2\text{OH} + .75 \text{ HCHO} + .25 \text{ CO} + .75 \text{ HO}_2 + .5 \text{ CH}_3\text{COCHO}$                             | $2.54\text{E-}12 \cdot \text{EXP}(360./\text{temp})$                                                                     | Pöschl et al. (2000)    |
| G4409 | TrGNC  | $\text{MVKO2} + \text{NO}_2 \rightarrow \text{MPAN}$                                                                                                                                                                                                          | $.25 \cdot k_{\text{3rd}}(\text{temp}, \text{cair}, 9.7\text{E-}29, 5.6, 9.3\text{E-}12, 1.5, 0.6)$                      | Pöschl et al. (2000)*   |
| G4410 | TrGC   | $\text{MVKO2} + \text{CH}_3\text{O}_2 \rightarrow .5 \text{ CH}_3\text{COCHO} + .375 \text{ CH}_3\text{COCH}_2\text{OH} + .125 \text{ CH}_3\text{C(O)OO} + 1.125 \text{ HCHO} + .875 \text{ HO}_2 + .125 \text{ CO} + .25 \text{ CH}_3\text{OH}$              | $2.\text{E-}12$                                                                                                          | von Kuhlmann (2001)     |
| G4411 | TrGC   | $\text{MVKO2} + \text{MVKO2} \rightarrow \text{CH}_3\text{COCH}_2\text{OH} + \text{CH}_3\text{COCHO} + .5 \text{ CO} + .5 \text{ HCHO} + \text{HO}_2$                                                                                                         | $2.\text{E-}12$                                                                                                          | Pöschl et al. (2000)    |
| G4412 | TrGC   | $\text{MVKOOH} + \text{OH} \rightarrow \text{MVKO2}$                                                                                                                                                                                                          | $3.\text{E-}11$                                                                                                          | Pöschl et al. (2000)    |
| G4413 | TrGC   | $\text{CH}_3\text{COC}_2\text{H}_5 + \text{OH} \rightarrow \text{MEKO2}$                                                                                                                                                                                      | $1.3\text{E-}12 \cdot \text{EXP}(-25./\text{temp})$                                                                      | Atkinson et al. (1999)  |
| G4414 | TrGC   | $\text{MEKO2} + \text{HO}_2 \rightarrow \text{MEKOOH}$                                                                                                                                                                                                        | $k_{\text{Pr02\_H02}}$                                                                                                   | see note                |
| G4415 | TrGNC  | $\text{MEKO2} + \text{NO} \rightarrow 0.985 \text{ ProdRO2} + .985 \text{ CH}_3\text{CHO} + .985 \text{ CH}_3\text{C(O)OO} + .985 \text{ NO}_2 + .015 \text{ ONIT}$                                                                                           | $k_{\text{Pr02\_N0}}$                                                                                                    | see note                |
| G4416 | TrGC   | $\text{MEKOOH} + \text{OH} \rightarrow .8 \text{ MeCOCO} + .8 \text{ OH} + .2 \text{ MEKO2}$                                                                                                                                                                  | $k_{\text{CH300H\_OH}}$                                                                                                  | see note                |
| G4417 | TrGNC  | $\text{ONIT} + \text{OH} \rightarrow \text{CH}_3\text{COC}_2\text{H}_5 + \text{NO}_2 + \text{H}_2\text{O}$                                                                                                                                                    | $1.7\text{E-}12$                                                                                                         | Atkinson et al. (1999)* |
| G4500 | TrGC   | $\text{ISOP} + \text{O}_3 \rightarrow .28 \text{ HCOOH} + .65 \text{ MVK} + .1 \text{ MVKO2} + .1 \text{ CH}_3\text{C(O)OO} + .14 \text{ CO} + .58 \text{ HCHO} + .09 \text{ H}_2\text{O}_2 + .08 \text{ CH}_3\text{O}_2 + .25 \text{ OH} + .25 \text{ HO}_2$ | $7.86\text{E-}15 \cdot \text{EXP}(-1913./\text{temp})$                                                                   | Pöschl et al. (2000)    |

Table 1: Gas phase reactions (... continued)

| #      | labels   | reaction                                                                                                                                                                                 | rate coefficient                                       | reference                                     |
|--------|----------|------------------------------------------------------------------------------------------------------------------------------------------------------------------------------------------|--------------------------------------------------------|-----------------------------------------------|
| G4501  | TrGC     | ISOP + OH $\rightarrow$ ISO2                                                                                                                                                             | 2.54E-11*EXP(410./temp)                                | Pöschl et al. (2000)                          |
| G4502  | TrGNC    | ISOP + NO <sub>3</sub> $\rightarrow$ ISON                                                                                                                                                | 3.03E-12*EXP(-446./temp)                               | Pöschl et al. (2000)                          |
| G4503  | TrGC     | ISO2 + HO <sub>2</sub> $\rightarrow$ ISOOH                                                                                                                                               | 2.22E-13*EXP(1300./temp)                               | Boyd et al. (2003)*                           |
| G4504a | TrGNC    | ISO2 + NO $\rightarrow$ .956 NO <sub>2</sub> + .956 MVK + .956 HCHO + .956 HO <sub>2</sub> + .044 ISON                                                                                   | 2.54E-12*EXP(360./temp)                                | Pöschl et al. (2000)*                         |
| G4505  | TrGC     | ISO2 + CH <sub>3</sub> O <sub>2</sub> $\rightarrow$ .5 MVK + 1.25 HCHO + HO <sub>2</sub> + .25 CH <sub>3</sub> COCHO + .25 CH <sub>3</sub> COCH <sub>2</sub> OH + .25 CH <sub>3</sub> OH | 2.E-12                                                 | von Kuhlmann (2001)                           |
| G4506  | TrGC     | ISO2 + ISO2 $\rightarrow$ 2 MVK + HCHO + HO <sub>2</sub>                                                                                                                                 | 2.E-12                                                 | Pöschl et al. (2000)                          |
| G4507  | TrGC     | ISOOH + OH $\rightarrow$ MVK + OH                                                                                                                                                        | 1.E-10                                                 | Pöschl et al. (2000)                          |
| G4508  | TrGNC    | ISON + OH $\rightarrow$ CH <sub>3</sub> COCH <sub>2</sub> OH + NACA                                                                                                                      | 1.3E-11                                                | Pöschl et al. (2000)                          |
| G6100  | StTrGCl  | Cl + O <sub>3</sub> $\rightarrow$ ClO + O <sub>2</sub>                                                                                                                                   | 2.8E-11*EXP(-250./temp)                                | Atkinson et al. (2007)                        |
| G6101  | StGCl    | ClO + O( <sup>3</sup> P) $\rightarrow$ Cl + O <sub>2</sub>                                                                                                                               | 2.5E-11*EXP(110./temp)                                 | Atkinson et al. (2007)                        |
| G6102a | StTrGCl  | ClO + ClO $\rightarrow$ Cl <sub>2</sub> + O <sub>2</sub>                                                                                                                                 | 1.0E-12*EXP(-1590./temp)                               | Atkinson et al. (2007)                        |
| G6102b | StTrGCl  | ClO + ClO $\rightarrow$ 2 Cl + O <sub>2</sub>                                                                                                                                            | 3.0E-11*EXP(-2450./temp)                               | Atkinson et al. (2007)                        |
| G6102c | StTrGCl  | ClO + ClO $\rightarrow$ Cl + OCIO                                                                                                                                                        | 3.5E-13*EXP(-1370./temp)                               | Atkinson et al. (2007)                        |
| G6102d | StTrGCl  | ClO + ClO $\rightarrow$ Cl <sub>2</sub> O <sub>2</sub>                                                                                                                                   | k_ClO_ClO                                              | Atkinson et al. (2007)                        |
| G6103  | StTrGCl  | Cl <sub>2</sub> O <sub>2</sub> $\rightarrow$ ClO + ClO                                                                                                                                   | k_ClO_ClO/(9.3E-28*EXP(8835./temp))                    | Atkinson et al. (2007), Sander et al. (2006)* |
| G6200  | StGCl    | Cl + H <sub>2</sub> $\rightarrow$ HCl + H                                                                                                                                                | 3.9E-11*EXP(-2310./temp)                               | Atkinson et al. (2007)                        |
| G6201a | StGCl    | Cl + HO <sub>2</sub> $\rightarrow$ HCl + O <sub>2</sub>                                                                                                                                  | 4.4E-11-7.5E-11*EXP(-620./temp)                        | Atkinson et al. (2007)                        |
| G6201b | StGCl    | Cl + HO <sub>2</sub> $\rightarrow$ ClO + OH                                                                                                                                              | 7.5E-11*EXP(-620./temp)                                | Atkinson et al. (2007)                        |
| G6202  | StTrGCl  | Cl + H <sub>2</sub> O <sub>2</sub> $\rightarrow$ HCl + HO <sub>2</sub>                                                                                                                   | 1.1E-11*EXP(-980./temp)                                | Atkinson et al. (2007)                        |
| G6203  | StGCl    | ClO + OH $\rightarrow$ .94 Cl + .94 HO <sub>2</sub> + .06 HCl + .06 O <sub>2</sub>                                                                                                       | 7.3E-12*EXP(300./temp)                                 | Atkinson et al. (2007)                        |
| G6204  | StTrGCl  | ClO + HO <sub>2</sub> $\rightarrow$ HOCl                                                                                                                                                 | 2.2E-12*EXP(340./temp)                                 | Atkinson et al. (2007)                        |
| G6205  | StTrGCl  | HCl + OH $\rightarrow$ Cl + H <sub>2</sub> O                                                                                                                                             | 1.7E-12*EXP(-230./temp)                                | Atkinson et al. (2007)                        |
| G6206  | StGCl    | HOCl + OH $\rightarrow$ ClO + H <sub>2</sub> O                                                                                                                                           | 3.0E-12*EXP(-500./temp)                                | Sander et al. (2006)                          |
| G6300  | StTrGNCl | ClO + NO $\rightarrow$ NO <sub>2</sub> + Cl                                                                                                                                              | 6.2E-12*EXP(295./temp)                                 | Atkinson et al. (2007)                        |
| G6301  | StTrGNCl | ClO + NO <sub>2</sub> $\rightarrow$ ClNO <sub>3</sub>                                                                                                                                    | k_3rd_iupac(temp, cair, 1.6E-31, 3.4, 7.E-11, 0., 0.4) | Atkinson et al. (2007)                        |
| G6302  | TrGCl    | ClNO <sub>3</sub> $\rightarrow$ ClO + NO <sub>2</sub>                                                                                                                                    | 6.918E-7*exp(-10909./temp)*cair                        | Anderson and Fahey (1990)                     |
| G6303  | StGNCl   | ClNO <sub>3</sub> + O( <sup>3</sup> P) $\rightarrow$ ClO + NO <sub>3</sub>                                                                                                               | 4.5E-12*EXP(-900./temp)                                | Atkinson et al. (2007)                        |
| G6304  | StTrGNCl | ClNO <sub>3</sub> + Cl $\rightarrow$ Cl <sub>2</sub> + NO <sub>3</sub>                                                                                                                   | 6.2E-12*EXP(145./temp)                                 | Atkinson et al. (2007)                        |
| G6400  | StTrGCl  | Cl + CH <sub>4</sub> $\rightarrow$ HCl + CH <sub>3</sub> O <sub>2</sub>                                                                                                                  | 6.6E-12*EXP(-1240./temp)                               | Atkinson et al. (2006)                        |
| G6401  | StTrGCl  | Cl + HCHO $\rightarrow$ HCl + CO + HO <sub>2</sub>                                                                                                                                       | 8.1E-11*EXP(-34./temp)                                 | Atkinson et al. (2006)                        |
| G6402  | StTrGCl  | Cl + CH <sub>3</sub> OOH $\rightarrow$ HCHO + HCl + OH                                                                                                                                   | 5.9E-11                                                | Atkinson et al. (2006)*                       |

Table 1: Gas phase reactions (... continued)

| #      | labels   | reaction                                                                                                                  | rate coefficient                                                                                                                                                      | reference                                              |
|--------|----------|---------------------------------------------------------------------------------------------------------------------------|-----------------------------------------------------------------------------------------------------------------------------------------------------------------------|--------------------------------------------------------|
| G6403  | StTrGCl  | $\text{ClO} + \text{CH}_3\text{O}_2 \rightarrow \text{HO}_2 + \text{Cl} + \text{HCHO}$                                    | $3.3\text{E-}12 \cdot \text{EXP}(-115./\text{temp})$                                                                                                                  | Sander et al. (2006)                                   |
| G6404  | StGCl    | $\text{CCl}_4 + \text{O}(^1\text{D}) \rightarrow \text{ClO} + 3 \text{Cl}$                                                | $3.3\text{E-}10$                                                                                                                                                      | Sander et al. (2006)                                   |
| G6405  | StGCl    | $\text{CH}_3\text{Cl} + \text{O}(^1\text{D}) \rightarrow \text{OH} + \text{Cl}$                                           | $1.65\text{E-}10$                                                                                                                                                     | see note                                               |
| G6406  | StGCl    | $\text{CH}_3\text{Cl} + \text{OH} \rightarrow \text{H}_2\text{O} + \text{Cl}$                                             | $2.4\text{E-}12 \cdot \text{EXP}(-1250./\text{temp})$                                                                                                                 | Sander et al. (2006)                                   |
| G6407  | StGCCl   | $\text{CH}_3\text{CCl}_3 + \text{O}(^1\text{D}) \rightarrow \text{OH} + 3 \text{Cl}$                                      | $3.\text{E-}10$                                                                                                                                                       | see note                                               |
| G6408  | StTrGCCl | $\text{CH}_3\text{CCl}_3 + \text{OH} \rightarrow \text{H}_2\text{O} + 3 \text{Cl}$                                        | $1.64\text{E-}12 \cdot \text{EXP}(-1520./\text{temp})$                                                                                                                | Sander et al. (2006)                                   |
| G6409  | TrGCCl   | $\text{Cl} + \text{C}_2\text{H}_4 \rightarrow .6666667 \text{CH}_3\text{CH}(\text{O}_2)\text{CH}_2\text{OH} + \text{HCl}$ | $k_{\text{3rd\_iupac}}(\text{temp}, \text{cair}, 1.85\text{E-}29, 3.3, 6.0\text{E-}10, 0.0, 0.4)$                                                                     | Atkinson et al. (2006)                                 |
| G6410  | TrGCCl   | $\text{Cl} + \text{CH}_3\text{CHO} \rightarrow \text{HCl} + \text{CH}_3\text{C}(\text{O})\text{OO}$                       | $7.9\text{e-}11$                                                                                                                                                      | Atkinson et al. (2006)                                 |
| G6500  | StGFCl   | $\text{CF}_2\text{Cl}_2 + \text{O}(^1\text{D}) \rightarrow \text{ClO} + \text{Cl}$                                        | $1.4\text{E-}10$                                                                                                                                                      | Sander et al. (2006)                                   |
| G6501  | StGFCl   | $\text{CFCl}_3 + \text{O}(^1\text{D}) \rightarrow \text{ClO} + 2 \text{Cl}$                                               | $2.3\text{E-}10$                                                                                                                                                      | Sander et al. (2006)                                   |
| G7100  | StTrGBr  | $\text{Br} + \text{O}_3 \rightarrow \text{BrO} + \text{O}_2$                                                              | $1.7\text{E-}11 \cdot \text{EXP}(-800./\text{temp})$                                                                                                                  | Atkinson et al. (2007)                                 |
| G7101  | StGBr    | $\text{BrO} + \text{O}(^3\text{P}) \rightarrow \text{RG7101} + \text{Br} + \text{O}_2$                                    | $1.9\text{E-}11 \cdot \text{EXP}(230./\text{temp})$                                                                                                                   | Atkinson et al. (2007)                                 |
| G7102a | StTrGBr  | $\text{BrO} + \text{BrO} \rightarrow 2 \text{Br} + \text{O}_2$                                                            | $2.7\text{E-}12$                                                                                                                                                      | Atkinson et al. (2007)                                 |
| G7102b | StTrGBr  | $\text{BrO} + \text{BrO} \rightarrow \text{Br}_2 + \text{O}_2$                                                            | $2.9\text{E-}14 \cdot \text{EXP}(840./\text{temp})$                                                                                                                   | Atkinson et al. (2007)                                 |
| G7200  | StTrGBr  | $\text{Br} + \text{HO}_2 \rightarrow \text{HBr} + \text{O}_2$                                                             | $7.7\text{E-}12 \cdot \text{EXP}(-450./\text{temp})$                                                                                                                  | Atkinson et al. (2007)                                 |
| G7201  | StTrGBr  | $\text{BrO} + \text{HO}_2 \rightarrow \text{HOBr} + \text{O}_2$                                                           | $4.5\text{E-}12 \cdot \text{EXP}(500./\text{temp})$                                                                                                                   | Atkinson et al. (2007)                                 |
| G7202  | StTrGBr  | $\text{HBr} + \text{OH} \rightarrow \text{Br} + \text{H}_2\text{O}$                                                       | $6.7\text{E-}12 \cdot \text{EXP}(155./\text{temp})$                                                                                                                   | Atkinson et al. (2007)                                 |
| G7203  | StGBr    | $\text{HOBr} + \text{O}(^3\text{P}) \rightarrow \text{OH} + \text{BrO}$                                                   | $1.2\text{E-}10 \cdot \text{EXP}(-430./\text{temp})$                                                                                                                  | Atkinson et al. (2007)                                 |
| G7204  | StTrGBr  | $\text{Br}_2 + \text{OH} \rightarrow \text{HOBr} + \text{Br}$                                                             | $2.0\text{E-}11 \cdot \text{EXP}(240./\text{temp})$                                                                                                                   | Atkinson et al. (2007)                                 |
| G7300  | TrGBr    | $\text{Br} + \text{BrNO}_3 \rightarrow \text{Br}_2 + \text{NO}_3$                                                         | $4.9\text{E-}11$                                                                                                                                                      | Orlando and Tyndall (1996)                             |
| G7301  | StTrGNBr | $\text{BrO} + \text{NO} \rightarrow \text{RG7301} + \text{Br} + \text{NO}_2$                                              | $8.7\text{E-}12 \cdot \text{EXP}(260./\text{temp})$                                                                                                                   | Atkinson et al. (2007)                                 |
| G7302  | StTrGNBr | $\text{BrO} + \text{NO}_2 \rightarrow \text{BrNO}_3$                                                                      | $k_{\text{BrO\_NO2}}$                                                                                                                                                 | Atkinson et al. (2007)*                                |
| G7303  | TrGBr    | $\text{BrNO}_3 \rightarrow \text{BrO} + \text{NO}_2$                                                                      | $k_{\text{BrO\_NO2}} / (5.44\text{E-}9 \cdot \exp(14192./\text{temp}) \cdot 1.\text{E6} \cdot R_{\text{gas}} \cdot \text{temp} / (\text{atm2Pa} \cdot N_{\text{A}}))$ | Orlando and Tyndall (1996),<br>Atkinson et al. (2007)* |
| G7400  | StTrGBr  | $\text{Br} + \text{HCHO} \rightarrow \text{HBr} + \text{CO} + \text{HO}_2$                                                | $7.7\text{E-}12 \cdot \text{EXP}(-580./\text{temp})$                                                                                                                  | Atkinson et al. (2006)                                 |
| G7401  | TrGBr    | $\text{Br} + \text{CH}_3\text{OOH} \rightarrow \text{CH}_3\text{O}_2 + \text{HBr}$                                        | $2.66\text{E-}12 \cdot \text{EXP}(-1610./\text{temp})$                                                                                                                | Mallard et al. (1993)                                  |
| G7402a | TrGBr    | $\text{BrO} + \text{CH}_3\text{O}_2 \rightarrow \text{HOBr} + \text{HCHO}$                                                | $0.8/1.1 \cdot 5.7\text{E-}12$                                                                                                                                        | Aranda et al. (1997)                                   |
| G7402b | TrGBr    | $\text{BrO} + \text{CH}_3\text{O}_2 \rightarrow \text{Br} + \text{HCHO} + \text{HO}_2$                                    | $0.3/1.1 \cdot 5.7\text{E-}12$                                                                                                                                        | Aranda et al. (1997)                                   |
| G7403  | StTrGBr  | $\text{CH}_3\text{Br} + \text{OH} \rightarrow \text{H}_2\text{O} + \text{Br}$                                             | $2.35\text{E-}12 \cdot \text{EXP}(-1300./\text{temp})$                                                                                                                | Sander et al. (2006)                                   |
| G7404  | TrGCBBr  | $\text{Br} + \text{C}_2\text{H}_4 \rightarrow .6666667 \text{CH}_3\text{CH}(\text{O}_2)\text{CH}_2\text{OH} + \text{HBr}$ | $2.8\text{E-}13 \cdot \text{EXP}(224./\text{temp}) / (1.+1.13\text{E+}24 \cdot \text{EXP}(-3200./\text{temp}) / C(\text{ind\_02}))$                                   | Atkinson et al. (2006)                                 |
| G7405  | TrGCCl   | $\text{Br} + \text{CH}_3\text{CHO} \rightarrow \text{HBr} + \text{CH}_3\text{C}(\text{O})\text{OO}$                       | $1.8\text{e-}11 \cdot \text{EXP}(-460./\text{temp})$                                                                                                                  | Atkinson et al. (2006)                                 |
| G7407  | TrGBr    | $\text{CHBr}_3 + \text{OH} \rightarrow \text{H}_2\text{O} + 3 \text{Br}$                                                  | $1.35\text{E-}12 \cdot \text{EXP}(-600./\text{temp})$                                                                                                                 | Sander et al. (2006)*                                  |
| G7408  | TrGBr    | $\text{CH}_2\text{Br}_2 + \text{OH} \rightarrow \text{H}_2\text{O} + 2 \text{Br}$                                         | $2.0\text{E-}12 \cdot \text{EXP}(-840./\text{temp})$                                                                                                                  | Sander et al. (2006)*                                  |

Table 1: Gas phase reactions (... continued)

| #      | labels    | reaction                                                                                                                                               | rate coefficient                                                                        | reference                   |
|--------|-----------|--------------------------------------------------------------------------------------------------------------------------------------------------------|-----------------------------------------------------------------------------------------|-----------------------------|
| G7600  | TrGBrCl   | $\text{Br} + \text{BrCl} \rightarrow \text{Br}_2 + \text{Cl}$                                                                                          | $3.3\text{E-}15$                                                                        | Mallard et al. (1993)       |
| G7601  | TrGClBr   | $\text{Br} + \text{Cl}_2 \rightarrow \text{BrCl} + \text{Cl}$                                                                                          | $1.1\text{E-}15$                                                                        | Mallard et al. (1993)       |
| G7602  | TrGClBr   | $\text{Br}_2 + \text{Cl} \rightarrow \text{BrCl} + \text{Br}$                                                                                          | $1.2\text{E-}10$                                                                        | Mallard et al. (1993)       |
| G7603a | StTrGClBr | $\text{BrO} + \text{ClO} \rightarrow \text{Br} + \text{OClO}$                                                                                          | $1.6\text{E-}12*\text{EXP}(430./\text{temp})$                                           | Atkinson et al. (2007)      |
| G7603b | StTrGClBr | $\text{BrO} + \text{ClO} \rightarrow \text{Br} + \text{Cl} + \text{O}_2$                                                                               | $2.9\text{E-}12*\text{EXP}(220./\text{temp})$                                           | Atkinson et al. (2007)      |
| G7603c | StTrGClBr | $\text{BrO} + \text{ClO} \rightarrow \text{BrCl} + \text{O}_2$                                                                                         | $5.8\text{E-}13*\text{EXP}(170./\text{temp})$                                           | Atkinson et al. (2007)      |
| G7604  | TrGClBr   | $\text{BrCl} + \text{Cl} \rightarrow \text{Br} + \text{Cl}_2$                                                                                          | $1.5\text{E-}11$                                                                        | Mallard et al. (1993)       |
| G7605  | TrGBr     | $\text{CHCl}_2\text{Br} + \text{OH} \rightarrow \text{H}_2\text{O} + \text{Br}$                                                                        | $2.0\text{E-}12*\text{EXP}(-840./\text{temp})$                                          | see note                    |
| G7606  | TrGBr     | $\text{CHClBr}_2 + \text{OH} \rightarrow \text{H}_2\text{O} + 2 \text{ Br}$                                                                            | $2.0\text{E-}12*\text{EXP}(-840./\text{temp})$                                          | see note                    |
| G7607  | TrGBr     | $\text{CH}_2\text{ClBr} + \text{OH} \rightarrow \text{H}_2\text{O} + \text{Br}$                                                                        | $2.4\text{E-}12*\text{EXP}(-920./\text{temp})$                                          | Sander et al. (2006)*       |
| G9200  | StTrGS    | $\text{SO}_2 + \text{OH} \rightarrow \text{H}_2\text{SO}_4 + \text{HO}_2$                                                                              | $\text{k\_3rd}(\text{temp}, \text{cair}, 3.3\text{E-}31, 4.3, 1.6\text{E-}12, 0., 0.6)$ | Sander et al. (2006)        |
| G9400a | TrGS      | $\text{DMS} + \text{OH} \rightarrow \text{CH}_3\text{SO}_2 + \text{HCHO}$                                                                              | $1.13\text{E-}11*\text{EXP}(-253./\text{temp})$                                         | Atkinson et al. (2004)*     |
| G9400b | TrGS      | $\text{DMS} + \text{OH} \rightarrow \text{DMSO} + \text{HO}_2$                                                                                         | $\text{k\_DMS\_OH}$                                                                     | Atkinson et al. (2004)*     |
| G9401  | TrGNS     | $\text{DMS} + \text{NO}_3 \rightarrow \text{CH}_3\text{SO}_2 + \text{HNO}_3 + \text{HCHO}$                                                             | $1.9\text{E-}13*\text{EXP}(520./\text{temp})$                                           | Atkinson et al. (2004)      |
| G9402  | TrGS      | $\text{DMSO} + \text{OH} \rightarrow .6 \text{ SO}_2 + \text{HCHO} + .6 \text{ CH}_3\text{O}_2 + .4 \text{ HO}_2 + .4 \text{ CH}_3\text{SO}_3\text{H}$ | $1.\text{E-}10$                                                                         | Hynes and Wine (1996)       |
| G9403  | TrGS      | $\text{CH}_3\text{SO}_2 \rightarrow \text{SO}_2 + \text{CH}_3\text{O}_2$                                                                               | $1.9\text{E}13*\text{EXP}(-8661./\text{temp})$                                          | Barone et al. (1995)        |
| G9404  | TrGS      | $\text{CH}_3\text{SO}_2 + \text{O}_3 \rightarrow \text{CH}_3\text{SO}_3$                                                                               | $3.\text{E-}13$                                                                         | Barone et al. (1995)        |
| G9405  | TrGS      | $\text{CH}_3\text{SO}_3 + \text{HO}_2 \rightarrow \text{CH}_3\text{SO}_3\text{H}$                                                                      | $5.\text{E-}11$                                                                         | Barone et al. (1995)        |
| G9600  | TrGSCl    | $\text{DMS} + \text{Cl} \rightarrow \text{CH}_3\text{SO}_2 + \text{HCl} + \text{HCHO}$                                                                 | $3.3\text{E-}10$                                                                        | Atkinson et al. (2004)      |
| G9700  | TrGSBr    | $\text{DMS} + \text{Br} \rightarrow \text{CH}_3\text{SO}_2 + \text{HBr} + \text{HCHO}$                                                                 | $9.\text{E-}11*\text{EXP}(-2386./\text{temp})$                                          | Jefferson et al. (1994)     |
| G9701  | TrGSBr    | $\text{DMS} + \text{BrO} \rightarrow \text{DMSO} + \text{Br}$                                                                                          | $2.54\text{E-}14*\text{EXP}(850./\text{temp})$                                          | Ingham et al. (1999)        |
| G10600 | TrGHgCl   | $\text{Hg} + \text{Cl} \rightarrow \text{HgCl}$                                                                                                        | $1.0\text{E-}11$                                                                        | Ariya et al. (2002)         |
| G10601 | TrGHgCl   | $\text{Hg} + \text{Cl}_2 \rightarrow \text{HgCl}_2$                                                                                                    | $2.6\text{E-}18$                                                                        | Ariya et al. (2002)         |
| G10700 | TrGHgBr   | $\text{Hg} + \text{Br} \rightarrow \text{HgBr}$                                                                                                        | $3.0\text{E-}13$                                                                        | Donohoue et al. (2006)      |
| G10701 | TrGHgBr   | $\text{HgBr} + \text{Br} \rightarrow \text{HgBr}_2$                                                                                                    | $3.0\text{E-}12$                                                                        | Calvert and Lindberg (2003) |
| G10702 | TrGHgBr   | $\text{Hg} + \text{Br}_2 \rightarrow \text{HgBr}_2$                                                                                                    | $9.0\text{E-}17$                                                                        | Ariya et al. (2002)         |
| G10703 | TrGHgBr   | $\text{Hg} + \text{BrO} \rightarrow \text{HgO} + \text{Br}$                                                                                            | $1.0\text{E-}15$                                                                        | Raofie and Ariya (2003)     |
| G10704 | TrGHgBr   | $\text{HgBr} + \text{BrO} \rightarrow \text{BrHgOBr}$                                                                                                  | $3.0\text{E-}12$                                                                        | Calvert and Lindberg (2003) |
| G10705 | TrGHgClBr | $\text{HgCl} + \text{BrO} \rightarrow \text{ClHgOBr}$                                                                                                  | $3.0\text{E-}12$                                                                        | Calvert and Lindberg (2003) |
| G10706 | TrGHgClBr | $\text{HgBr} + \text{Cl} \rightarrow \text{ClHgBr}$                                                                                                    | $3.0\text{E-}12$                                                                        | Calvert and Lindberg (2003) |
| G10707 | TrGHgClBr | $\text{HgCl} + \text{Br} \rightarrow \text{ClHgBr}$                                                                                                    | $3.0\text{E-}12$                                                                        | Calvert and Lindberg (2003) |

\*Notes:

Rate coefficients for three-body reactions are defined via the function `k_3rd(T, M, k0300, n, kinf300, m, fc)`. In the code, the temperature  $T$  is called `temp` and the concentration of “air molecules”  $M$  is called `cair`. Using the auxiliary variables  $k_0(T)$ ,  $k_{\text{inf}}(T)$ , and  $k_{\text{ratio}}$ , `k_3rd` is defined as:

$$k_0(T) = k_0^{300} \times \left(\frac{300\text{K}}{T}\right)^n \quad (1)$$

$$k_{\text{inf}}(T) = k_{\text{inf}}^{300} \times \left(\frac{300\text{K}}{T}\right)^m \quad (2)$$

$$k_{\text{ratio}} = \frac{k_0(T)M}{k_{\text{inf}}(T)} \quad (3)$$

$$\text{k\_3rd} = \frac{k_0(T)M}{1 + k_{\text{ratio}}} \times f_c \left( \frac{1}{1 + (\log_{10}(k_{\text{ratio}}))^2} \right) \quad (4)$$

A similar function, called `k_3rd_iupac` here, is used by Atkinson et al. (2005) for three-body reactions. It has the same function parameters as `k_3rd` and it is defined as:

$$k_0(T) = k_0^{300} \times \left(\frac{300\text{K}}{T}\right)^n \quad (5)$$

$$k_{\text{inf}}(T) = k_{\text{inf}}^{300} \times \left(\frac{300\text{K}}{T}\right)^m \quad (6)$$

$$k_{\text{ratio}} = \frac{k_0(T)M}{k_{\text{inf}}(T)} \quad (7)$$

$$N = 0.75 - 1.27 \times \log_{10}(f_c) \quad (8)$$

$$\text{k\_3rd\_iupac} = \frac{k_0(T)M}{1 + k_{\text{ratio}}} \times f_c \left( \frac{1}{1 + (\log_{10}(k_{\text{ratio}})/N)^2} \right) \quad (9)$$

G1002: The path leading to  $2 \text{ O}(^3\text{P}) + \text{O}_2$  results in a null cycle regarding odd oxygen and is neglected.

G2110: The rate coefficient is: `k_H02_H02 = (1.5E-12*EXP(19./temp)+1.7E-33*EXP(1000./temp)`

`*cair)*(1.+1.4E-21*EXP(2200./temp)*C(ind_H20))`. The value for the first (pressure-independent) part is from Christensen et al. (2002), the water term from Kircher and Sander (1984).

G3109: The rate coefficient is: `k_NO3_NO2 = k_3rd(temp, cair, 2.E-30, 4.4, 1.4E-12, 0.7, 0.6)`.

G3110: The rate coefficient is defined as backward reaction divided by equilibrium constant.

G3203: The rate coefficient is: `k_NO2_H02 = k_3rd(temp, cair, 1.8E-31, 3.2, 4.7E-12, 1.4, 0.6)`.

G3206: The rate coefficient is: `k_HN03_OH = 2.4E-14 * EXP(460./temp) + 1./ ( 1./ (6.5E-34 * EXP(1335./temp)*cair) + 1./ (2.7E-17 * EXP(2199./temp)) )`

G3207: The rate coefficient is defined as backward reaction divided by equilibrium constant.

G4103: Sander et al. (2006) recommend a zero product yield for HCHO.

G4107: The rate coefficient is: `k_CH300H_OH = 3.8E-12*EXP(200./temp)`.

G4109: The same temperature dependence assumed as for  $\text{CH}_3\text{CHO} + \text{NO}_3$ .

G4201: The product distribution is from von Kuhlmann (2001) (see also Neeb et al. (1998)).

G4206: The rate coefficient was calculated by von Kuhlmann (pers. comm. 2004) using self reactions of  $\text{CH}_3\text{OO}$  and  $\text{C}_2\text{H}_5\text{OO}$  from Sander et al. (2003) and geometric mean as suggested by Madronich and Calvert (1990) and Kirchner and Stockwell (1996). The product distribution (branching=0.5/0.25/0.25) is calculated by von Kuhlmann (pers. comm. 2004) based on Villenave and Lesclaux (1996) and Tyndall et al. (2001).

G4207: Same value as for G4107:  $\text{CH}_3\text{OOH} + \text{OH}$  assumed.

G4216: The value  $1.0\text{E}-11$  is from Atkinson et al. (1999), the temperature dependence from Kirchner and Stockwell (1996).

G4218: Same value as for G4107:  $\text{CH}_3\text{OOH} + \text{OH}$  assumed.

G4219: According to Pöschl et al. (2000), the same value as for  $\text{CH}_3\text{CHO} + \text{OH}$  can be assumed.

G4220: This is 50% of the upper limit given by Sander et al. (2003), as suggested by von Kuhlmann (2001).

G4221: The rate coefficient is: `k_PAN_M = k_PA_NO2/9.E-29*EXP(-14000./temp)`, i.e. the rate coefficient is defined as backward reaction divided by equilibrium constant.

G4301: The product distribution is for terminal olefin carbons from Zaveri and Peters (1999).

G4304: The rate coefficient is: `k_Pr02_H02 = 1.9E-13*EXP(1300./temp)`. Value for generic  $\text{RO}_2 + \text{HO}_2$  reaction from Atkinson (1997) is used.

G4305: The rate coefficient is: `k_Pr02_NO = 2.7E-12*EXP(360./temp)`.

G4307: Same value as for G4107:  $\text{CH}_3\text{OOH} + \text{OH}$  assumed.

G4309: The products are from von Kuhlmann (2001).

G4315: Same value as for G4107:  $\text{CH}_3\text{OOH} + \text{OH}$  assumed.

G4319: Same value as for PAN assumed.

G4401: Same value as for propyl group assumed (`k_Pr02_CH302`).

G4402: Same value as for propyl group assumed (`k_Pr02_H02`).

G4403: Same value as for propyl group assumed (`k_Pr02_NO`).

G4404: Same value as for G4107:  $\text{CH}_3\text{OOH} + \text{OH}$  assumed.

G4409: The factor 0.25 was recommended by Uli Poeschl (pers. comm. 2004).

G4414: Same value as for propyl group assumed ( $k_{PrO2\_H02}$ ).

G4415: Same value as for propyl group assumed ( $k_{PrO2\_N0}$ ).

G4416: Same value as for G4107:  $CH_3OOH+OH$  assumed.

G4417: Value for  $C_4H_9ONO_2$  used here.

G4503: Same temperature dependence assumed as for other  $RO_2+HO_2$  reactions.

G4504: Yield of 12 %  $RONO_2$  assumed as suggested in Table 2 of Sprengnether et al. (2002).

G6103: The rate coefficient is defined as backward reaction divided by equilibrium constant.

G6402: The initial products are probably  $HCl$  and  $CH_2OOH$  (Atkinson et al., 2006). It is assumed that  $CH_2OOH$  dissociates into  $HCHO$  and  $OH$ .

G6405: Average of reactions with  $CH_3Br$  and  $CH_3F$  from Sander et al. (2006) (B. Steil, pers. comm.).

G6407: Rough extrapolation from reactions with  $CH_3CF_3$ ,  $CH_3CClF_2$ , and  $CH_3CCl_2F$  from Sander et al. (2006).

G7302: The rate coefficient is:  $k_{BrO\_N02} = k_{3rd(temp, cair, 5.2E-31, 3.2, 6.9E-12, 2.9, 0.6)}$ .

G7303: The rate coefficient is defined as backward reaction (Atkinson et al., 2007) divided by equilibrium constant (Orlando and Tyndall, 1996).

G7407: It is assumed that the reaction liberates all Br atoms. The fate of the carbon atom is currently not considered.

G7408: It is assumed that the reaction liberates all Br atoms. The fate of the carbon atom is currently not considered.

G7605: Same value as for G7408:  $CH_2Br_2+OH$  assumed. It is assumed that the reaction liberates all Br atoms but not Cl. The fate of the carbon atom is currently not considered.

G7606: Same value as for G7408:  $CH_2Br_2+OH$  assumed. It is assumed that the reaction liberates all Br atoms but not Cl. The fate of the carbon atom is currently not considered.

G7607: It is assumed that the reaction liberates all Br atoms but not Cl. The fate of the carbon atom is currently not considered.

G9400: Addition path. The rate coefficient is:  $k_{DMS\_OH} = 1.0E-39*EXP(5820./temp)*C(ind\_02) / (1.+5.0E-30*EXP(6280./temp)*C(ind\_02))$ .

Table 2: Photolysis reactions

| #      | labels  | reaction                                                                          | rate coefficient     | reference |
|--------|---------|-----------------------------------------------------------------------------------|----------------------|-----------|
| J1000  | StTrGJ  | $O_2 + h\nu \rightarrow O(^3P) + O(^3P)$                                          | jx(ip_02)            | see note  |
| J1001a | StTrGJ  | $O_3 + h\nu \rightarrow O(^1D)$                                                   | jx(ip_01D)           | see note  |
| J1001b | StTrGJ  | $O_3 + h\nu \rightarrow O(^3P)$                                                   | jx(ip_03P)           | see note  |
| J2100  | StGJ    | $H_2O + h\nu \rightarrow H + OH$                                                  | jx(ip_H20)           | see note  |
| J2101  | StTrGJ  | $H_2O_2 + h\nu \rightarrow 2 OH$                                                  | jx(ip_H202)          | see note  |
| J3100  | StGNJ   | $N_2O + h\nu \rightarrow O(^1D)$                                                  | jx(ip_N20)           | see note  |
| J3101  | StTrGNJ | $NO_2 + h\nu \rightarrow NO + O(^3P)$                                             | jx(ip_N02)           | see note  |
| J3102  | StGNJ   | $NO + h\nu \rightarrow N + O(^3P)$                                                | jx(ip_N0)            | see note  |
| J3103a | StTrGNJ | $NO_3 + h\nu \rightarrow NO_2 + O(^3P)$                                           | jx(ip_N020)          | see note  |
| J3103b | StTrGNJ | $NO_3 + h\nu \rightarrow NO$                                                      | jx(ip_N002)          | see note  |
| J3104a | StTrGNJ | $N_2O_5 + h\nu \rightarrow NO_2 + NO_3$                                           | jx(ip_N205)          | see note  |
| J3104b | StGNJ   | $N_2O_5 + h\nu \rightarrow NO + O(^3P) + NO_3$                                    | jx(ip_N03N00)        | see note  |
| J3200  | TrGJ    | $HONO + h\nu \rightarrow NO + OH$                                                 | jx(ip_HONO)          | see note  |
| J3201  | StTrGNJ | $HNO_3 + h\nu \rightarrow NO_2 + OH$                                              | jx(ip_HN03)          | see note  |
| J3202  | StTrGNJ | $HNO_4 + h\nu \rightarrow .667 NO_2 + .667 HO_2 + .333 NO_3 + .333 OH$            | jx(ip_HN04)          | see note  |
| J4100  | StTrGJ  | $CH_3OOH + h\nu \rightarrow HCHO + OH + HO_2$                                     | jx(ip_CH300H)        | see note  |
| J4101a | StTrGJ  | $HCHO + h\nu \rightarrow H_2 + CO$                                                | jx(ip_COH2)          | see note  |
| J4101b | StTrGJ  | $HCHO + h\nu \rightarrow H + CO + HO_2$                                           | jx(ip_CHOH)          | see note  |
| J4102  | StGJ    | $CO_2 + h\nu \rightarrow CO + O(^3P)$                                             | jx(ip_CO2)           | see note  |
| J4103  | StGJ    | $CH_4 + h\nu \rightarrow CO + 0.31 H + 0.69 H_2 + 1.155 H_2O$                     | jx(ip_CH4)           | see note  |
| J4200  | TrGCJ   | $C_2H_5OOH + h\nu \rightarrow CH_3CHO + HO_2 + OH$                                | jx(ip_CH300H)        | see note  |
| J4201  | TrGCJ   | $CH_3CHO + h\nu \rightarrow CH_3O_2 + HO_2 + CO$                                  | jx(ip_CH3CHO)        | see note  |
| J4202  | TrGCJ   | $CH_3C(O)OOH + h\nu \rightarrow CH_3O_2 + OH$                                     | jx(ip_PAA)           | see note  |
| J4203  | TrGNJCJ | $NACA + h\nu \rightarrow NO_2 + HCHO + CO$                                        | $0.19*jx(ip\_CHOH)$  | see note  |
| J4204  | TrGNJCJ | $PAN + h\nu \rightarrow .6 CH_3C(O)OO + .6 NO_2 + .4 CH_3O_2 + .4 NO_3 + .4 CO_2$ | jx(ip_PAN)           | see note  |
| J4300  | TrGCJ   | $C_3H_7OOH + h\nu \rightarrow CH_3COCH_3 + HO_2 + OH$                             | jx(ip_CH300H)        | see note  |
| J4301  | TrGCJ   | $CH_3COCH_3 + h\nu \rightarrow CH_3C(O)OO + CH_3O_2$                              | jx(ip_CH3COCH3)      | see note  |
| J4302  | TrGCJ   | $CH_3COCH_2OH + h\nu \rightarrow CH_3C(O)OO + HCHO + HO_2$                        | $0.074*jx(ip\_CHOH)$ | see note  |
| J4303  | TrGCJ   | $CH_3COCHO + h\nu \rightarrow CH_3C(O)OO + CO + HO_2$                             | jx(ip_CH3COCHO)      | see note  |
| J4304  | TrGCJ   | $CH_3COCH_2O_2H + h\nu \rightarrow CH_3C(O)OO + HO_2 + OH$                        | jx(ip_CH300H)        | see note  |
| J4305  | TrGNJCJ | $MPAN + h\nu \rightarrow CH_3COCH_2OH + NO_2$                                     | jx(ip_PAN)           | see note  |
| J4306  | TrGNJCJ | $C_3H_7ONO_2 + h\nu \rightarrow CH_3COCH_3 + NO_2 + HO_2$                         | $3.7*jx(ip\_PAN)$    | see note  |

Table 2: Photolysis reactions (... continued)

| #      | labels     | reaction                                                                                                         | rate coefficient                           | reference |
|--------|------------|------------------------------------------------------------------------------------------------------------------|--------------------------------------------|-----------|
| J4400  | TrGCJ      | $C_4H_9OOH + h\nu \rightarrow OH + .67 CH_3COC_2H_5 + .67 HO_2 + .33 C_2H_5O_2 + .33 CH_3CHO$                    | $jx(ip\_CH300H)$                           | see note  |
| J4401  | TrGCJ      | $MVK + h\nu \rightarrow CH_3C(O)OO + HCHO + CO + HO_2$                                                           | $0.019*jx(ip\_COH2)+.015*jx(ip\_CH3COCHO)$ | see note  |
| J4402  | TrGCJ      | $MVKOOH + h\nu \rightarrow OH + .5 CH_3COCHO + .25 CH_3COCH_2OH + .75 HCHO + .75 HO_2 + .25 CH_3C(O)OO + .25 CO$ | $jx(ip\_CH300H)$                           | see note  |
| J4403  | TrGCJ      | $CH_3COC_2H_5 + h\nu \rightarrow CH_3C(O)OO + C_2H_5O_2$                                                         | $0.42*jx(ip\_CHOH)$                        | see note  |
| J4404  | TrGCJ      | $MEKOOH + h\nu \rightarrow CH_3C(O)OO + CH_3CHO + OH$                                                            | $jx(ip\_CH300H)$                           | see note  |
| J4405  | TrGCJ      | $MeCOCO + h\nu \rightarrow 2 CH_3C(O)OO$                                                                         | $2.15*jx(ip\_CH3COCHO)$                    | see note  |
| J4406  | TrGN CJ    | $ONIT + h\nu \rightarrow NO_2 + .67 CH_3COC_2H_5 + .67 HO_2 + .33 C_2H_5O_2 + .33 CH_3CHO$                       | $3.7*jx(ip\_PAN)$                          | see note  |
| J4500  | TrGCJ      | $ISOOH + h\nu \rightarrow MVK + HCHO + HO_2 + OH$                                                                | $jx(ip\_CH300H)$                           | see note  |
| J4501  | TrGN CJ    | $ISON + h\nu \rightarrow MVK + HCHO + NO_2 + HO_2$                                                               | $3.7*jx(ip\_PAN)$                          | see note  |
| J6000  | StTrGClJ   | $Cl_2 + h\nu \rightarrow Cl + Cl$                                                                                | $jx(ip\_Cl2)$                              | see note  |
| J6100  | StTrGClJ   | $Cl_2O_2 + h\nu \rightarrow 2 Cl$                                                                                | $1.4*jx(ip\_Cl2O2)$                        | see note  |
| J6101  | StTrGClJ   | $OCIO + h\nu \rightarrow ClO + O(^3P)$                                                                           | $jx(ip\_OCIO)$                             | see note  |
| J6200  | StGClJ     | $HCl + h\nu \rightarrow Cl + H$                                                                                  | $jx(ip\_HCl)$                              | see note  |
| J6201  | StTrGClJ   | $HOCl + h\nu \rightarrow OH + Cl$                                                                                | $jx(ip\_HOCl)$                             | see note  |
| J6300  | TrGN ClJ   | $ClNO_2 + h\nu \rightarrow Cl + NO_2$                                                                            | $jx(ip\_ClNO2)$                            | see note  |
| J6301a | StTrGN ClJ | $ClNO_3 + h\nu \rightarrow Cl + NO_3$                                                                            | $jx(ip\_ClNO3)$                            | see note  |
| J6301b | StTrGN ClJ | $ClNO_3 + h\nu \rightarrow ClO + NO_2$                                                                           | $jx(ip\_ClONO2)$                           | see note  |
| J6400  | StGClJ     | $CH_3Cl + h\nu \rightarrow Cl + CH_3O_2$                                                                         | $jx(ip\_CH3Cl)$                            | see note  |
| J6401  | StGClJ     | $CCl_4 + h\nu \rightarrow 4 Cl$                                                                                  | $jx(ip\_CCl4)$                             | see note  |
| J6402  | StGCClJ    | $CH_3CCl_3 + h\nu \rightarrow 3 Cl$                                                                              | $jx(ip\_CH3CCl3)$                          | see note  |
| J6500  | StGFClJ    | $CFCl_3 + h\nu \rightarrow 3 Cl$                                                                                 | $jx(ip\_CFC13)$                            | see note  |
| J6501  | StGFClJ    | $CF_2Cl_2 + h\nu \rightarrow 2 Cl$                                                                               | $jx(ip\_CF2Cl2)$                           | see note  |
| J7000  | StTrGBrJ   | $Br_2 + h\nu \rightarrow Br + Br$                                                                                | $jx(ip\_Br2)$                              | see note  |
| J7100  | TrGBrJ     | $BrO + h\nu \rightarrow RJ7100 + Br + O(^3P)$                                                                    | $jx(ip\_BrO)$                              | see note  |
| J7200  | StTrGBrJ   | $HOBr + h\nu \rightarrow Br + OH$                                                                                | $jx(ip\_HOBr)$                             | see note  |
| J7300  | TrGNBrJ    | $BrNO_2 + h\nu \rightarrow Br + NO_2$                                                                            | $jx(ip\_BrNO2)$                            | see note  |
| J7301  | StTrGNBrJ  | $BrNO_3 + h\nu \rightarrow 0.29 Br + 0.29 NO_3 + 0.71 BrO + 0.71 NO_2$                                           | $jx(ip\_BrNO3)$                            | see note  |
| J7400  | StGBrJ     | $CH_3Br + h\nu \rightarrow Br + CH_3O_2$                                                                         | $jx(ip\_CH3Br)$                            | see note  |
| J7401  | TrGBrJ     | $CH_2Br_2 + h\nu \rightarrow 2 Br$                                                                               | $jx(ip\_CH2Br2)$                           | see note  |
| J7402  | TrGBrJ     | $CHBr_3 + h\nu \rightarrow 3 Br$                                                                                 | $jx(ip\_CHBr3)$                            | see note  |
| J7500  | StGFBrJ    | $CF_3Br + h\nu \rightarrow Br$                                                                                   | $jx(ip\_CF3Br)$                            | see note  |

Table 2: Photolysis reactions (... continued)

| #      | labels     | reaction                                                            | rate coefficient         | reference |
|--------|------------|---------------------------------------------------------------------|--------------------------|-----------|
| J7600  | StTrGClBrJ | $\text{BrCl} + h\nu \rightarrow \text{Br} + \text{Cl}$              | $\text{jx(ip\_BrCl)}$    | see note  |
| J7601  | StGFBrJ    | $\text{CF}_2\text{ClBr} + h\nu \rightarrow \text{Br} + \text{Cl}$   | $\text{jx(ip\_CF2ClBr)}$ | see note  |
| J7602  | TrGClBrJ   | $\text{CH}_2\text{ClBr} + h\nu \rightarrow \text{Br} + \text{Cl}$   | $\text{jx(ip\_CH2ClBr)}$ | see note  |
| J7603  | TrGClBrJ   | $\text{CHCl}_2\text{Br} + h\nu \rightarrow \text{Br} + 2 \text{Cl}$ | $\text{jx(ip\_CHCl2Br)}$ | see note  |
| J7604  | TrGClBrJ   | $\text{CHClBr}_2 + h\nu \rightarrow 2 \text{Br} + \text{Cl}$        | $\text{jx(ip\_CHClBr2)}$ | see note  |
| J8401a | TrGJ       | $\text{CH}_3\text{I} + h\nu \rightarrow \text{CH}_3\text{O}_2$      | $\text{JX(ip\_CH3I)}$    | see note  |
| J9002  | StGSJ      | $\text{SF}_6 + h\nu \rightarrow \text{products}$                    | $\text{JX(ip\_SF6)}$     | see note  |

\*Notes:

J-values are calculated with an external module and then supplied to the MECCA chemistry

J6100: Stimpfle et al. (2004) claim that the combination of absorption cross sections from Burkholder et al. (1990) and the  $\text{Cl}_2\text{O}_2$  formation rate coefficient by

Sander et al. (2003) can approximately reproduce the observed  $\text{Cl}_2\text{O}_2/\text{ClO}$  ratios and ozone depletion. They give an almost zenith-angle independent ratio of 1.4 for Burkholder et al. (1990) to Sander et al. (2003) J-values. The IUPAC recommendation for the  $\text{Cl}_2\text{O}_2$  formation rate is about 5 to 15 % less than the value by Sander

et al. (2003) but more than 20 % larger than the value by Sander et al. (2000). The J-values by Burkholder et al. (1990) are within the uncertainty range of the IUPAC recommendation.

J7301: The quantum yields are from Sander et al. (2003).

Table 3: Henry's law coefficients

| substance                      | $\frac{k_H^\ominus}{\text{M/atm}}$   | $\frac{-\Delta_{\text{soln}}H/R}{\text{K}}$ | reference                       |
|--------------------------------|--------------------------------------|---------------------------------------------|---------------------------------|
| O <sub>2</sub>                 | $1.3 \times 10^{-3}$                 | 1500.                                       | Wilhelm et al. (1977)           |
| O <sub>3</sub>                 | $1.2 \times 10^{-2}$                 | 2560.                                       | Chameides (1984)                |
| OH                             | $3.0 \times 10^1$                    | 4300.                                       | Hanson et al. (1992)            |
| HO <sub>2</sub>                | $3.9 \times 10^3$                    | 5900.                                       | Hanson et al. (1992)            |
| H <sub>2</sub> O <sub>2</sub>  | $1. \times 10^5$                     | 6338.                                       | Lind and Kok (1994)             |
| NH <sub>3</sub>                | 58.                                  | 4085.                                       | Chameides (1984)                |
| NO                             | $1.9 \times 10^{-3}$                 | 1480.                                       | Schwartz and White (1981)       |
| NO <sub>2</sub>                | $7.0 \times 10^{-3}$                 | 2500.                                       | Lee and Schwartz (1981)*        |
| NO <sub>3</sub>                | 2.                                   | 2000.                                       | Thomas et al. (1993)            |
| HONO                           | $4.9 \times 10^1$                    | 4780.                                       | Schwartz and White (1981)       |
| HNO <sub>3</sub>               | $2.45 \times 10^6 / 1.5 \times 10^1$ | 8694.                                       | Brimblecombe and Clegg (1989)*  |
| HNO <sub>4</sub>               | $1.2 \times 10^4$                    | 6900.                                       | Régimbal and Mozurkewich (1997) |
| CH <sub>3</sub> O <sub>2</sub> | 6.                                   | 5600.                                       | Jacob (1986)*                   |
| CH <sub>3</sub> OOH            | $3.0 \times 10^2$                    | 5322.                                       | Lind and Kok (1994)             |
| HCHO                           | $7.0 \times 10^3$                    | 6425.                                       | Chameides (1984)                |
| HCOOH                          | $3.7 \times 10^3$                    | 5700.                                       | Chameides (1984)                |
| CO <sub>2</sub>                | $3.1 \times 10^{-2}$                 | 2423.                                       | Chameides (1984)                |
| Cl <sub>2</sub>                | $9.2 \times 10^{-2}$                 | 2081.                                       | Bartlett and Margerum (1999)    |
| HCl                            | 2./1.7                               | 9001.                                       | Brimblecombe and Clegg (1989)   |
| HOCl                           | $6.7 \times 10^2$                    | 5862.                                       | Huthwelker et al. (1995)        |
| Br <sub>2</sub>                | $7.7 \times 10^{-1}$                 | 3837.                                       | Bartlett and Margerum (1999)    |
| HBr                            | 1.3                                  | 10239.                                      | Brimblecombe and Clegg (1989)*  |
| HOBr                           | $9.3 \times 10^1$                    | 5862.                                       | Vogt et al. (1996)*             |
| BrCl                           | $9.4 \times 10^{-1}$                 | 5600.                                       | Bartlett and Margerum (1999)    |
| SO <sub>2</sub>                | 1.2                                  | 3120.                                       | Chameides (1984)                |
| H <sub>2</sub> SO <sub>4</sub> | $1. \times 10^{11}$                  | 0.                                          | see note                        |
| DMSO                           | $5. \times 10^4$                     | 6425.                                       | De Bruyn et al. (1994)*         |
| Hg                             | 0.13                                 | 0.                                          | Schroeder and Munthe (1998)     |
| HgO                            | $3.2 \times 10^6$                    | 0.                                          | Shon et al. (2005)              |
| HgCl <sub>2</sub>              | $2.4 \times 10^7$                    | 0.                                          | Shon et al. (2005)              |
| HgBr <sub>2</sub>              | $2.4 \times 10^7$                    | 0.                                          | see note                        |
| ClHgBr                         | $2.4 \times 10^7$                    | 0.                                          | see note                        |
| BrHgOBr                        | $2.4 \times 10^7$                    | 0.                                          | see note                        |

Table 3: Henry's law coefficients (... continued)

| substance | $k_H^\ominus$<br>M/atm | $\frac{-\Delta_{\text{soln}}H/R}{\text{K}}$ | reference |
|-----------|------------------------|---------------------------------------------|-----------|
| ClHgOBr   | $2.4 \times 10^7$      | 0.                                          | see note  |

\*Notes:

(1984).

The temperature dependence of the Henry constants is:

$$K_H = K_H^\ominus \times \exp \left( \frac{-\Delta_{\text{soln}}H}{R} \left( \frac{1}{T} - \frac{1}{T^\ominus} \right) \right)$$

where  $\Delta_{\text{soln}}H$  = molar enthalpy of dissolution [J/mol]  
and  $R = 8.314 \text{ J/(mol K)}$ .

NO<sub>2</sub>: The temperature dependence is from Chameides

HNO<sub>3</sub>: Calculated using the acidity constant from Davis and de Bruin (1964).

CH<sub>3</sub>O<sub>2</sub>: This value was estimated by Jacob (1986).

HBr: Calculated using the acidity constant from Lax (1969).

HOBr: This value was estimated by Vogt et al. (1996).

H<sub>2</sub>SO<sub>4</sub>: To account for the very high Henry's law coefficient of H<sub>2</sub>SO<sub>4</sub>, a very high value was chosen arbitrarily.

DMSO: Lower limit cited from another reference.

HgBr<sub>2</sub>: Assumed to be the same as for HgCl<sub>2</sub>

ClHgBr: Assumed to be the same as for HgCl<sub>2</sub>

BrHgOBr: Assumed to be the same as for HgCl<sub>2</sub>

ClHgOBr: Assumed to be the same as for HgCl<sub>2</sub>

Table 4: Accommodation coefficients

| substance                         | $\alpha^\ominus$     | $\frac{-\Delta_{\text{obs}}H/R}{K}$ | reference                     |
|-----------------------------------|----------------------|-------------------------------------|-------------------------------|
| O <sub>2</sub>                    | 0.01                 | 2000.                               | see note                      |
| O <sub>3</sub>                    | 0.002                | 0.                                  | DeMore et al. (1997)*         |
| OH                                | 0.01                 | 0.                                  | Takami et al. (1998)*         |
| HO <sub>2</sub>                   | 0.5                  | 0.                                  | Thornton and Abbatt (2005)    |
| H <sub>2</sub> O <sub>2</sub>     | 0.077                | 3127.                               | Worsnop et al. (1989)         |
| NH <sub>3</sub>                   | 0.06                 | 0.                                  | DeMore et al. (1997)*         |
| NO                                | $5.0 \times 10^{-5}$ | 0.                                  | Saastad et al. (1993)*        |
| NO <sub>2</sub>                   | 0.0015               | 0.                                  | Ponche et al. (1993)*         |
| NO <sub>3</sub>                   | 0.04                 | 0.                                  | Rudich et al. (1996)*         |
| N <sub>2</sub> O <sub>5</sub>     | 0.1                  | 0.                                  | DeMore et al. (1997)*         |
| HONO                              | 0.04                 | 0.                                  | DeMore et al. (1997)*         |
| HNO <sub>3</sub>                  | 0.5                  | 0.                                  | Abbatt and Waschewsky (1998)* |
| HNO <sub>4</sub>                  | 0.1                  | 0.                                  | DeMore et al. (1997)*         |
| CH <sub>3</sub> O <sub>2</sub>    | 0.01                 | 2000.                               | see note                      |
| CH <sub>3</sub> OOH               | 0.0046               | 3273.                               | Magi et al. (1997)            |
| HCHO                              | 0.04                 | 0.                                  | DeMore et al. (1997)*         |
| HCOOH                             | 0.014                | 3978.                               | DeMore et al. (1997)          |
| CO <sub>2</sub>                   | 0.01                 | 2000.                               | see note                      |
| Cl <sub>2</sub>                   | 0.038                | 6546.                               | Hu et al. (1995)              |
| HCl                               | 0.074                | 3072.                               | Schweitzer et al. (2000)*     |
| HOCl                              | 0.5                  | 0.                                  | see note                      |
| ClNO <sub>3</sub>                 | 0.108                | 0.                                  | Deiber et al. (2004)*         |
| Br <sub>2</sub>                   | 0.038                | 6546.                               | Hu et al. (1995)              |
| HBr                               | 0.032                | 3940.                               | Schweitzer et al. (2000)*     |
| HOBr                              | 0.5                  | 0.                                  | Abbatt and Waschewsky (1998)* |
| BrNO <sub>3</sub>                 | 0.063                | 0.                                  | Deiber et al. (2004)*         |
| BrCl                              | 0.38                 | 6546.                               | see note                      |
| SO <sub>2</sub>                   | 0.11                 | 0.                                  | DeMore et al. (1997)          |
| H <sub>2</sub> SO <sub>4</sub>    | 0.65                 | 0.                                  | Pöschl et al. (1998)*         |
| CH <sub>3</sub> SO <sub>3</sub> H | 0.076                | 1762.                               | De Bruyn et al. (1994)        |
| DMSO                              | 0.048                | 2578.                               | De Bruyn et al. (1994)        |
| Hg                                | 0.1                  | 0.                                  | see note                      |
| HgO                               | 0.1                  | 0.                                  | see note                      |
| HgCl <sub>2</sub>                 | 0.1                  | 0.                                  | see note                      |

Table 4: Accommodation coefficients (... continued)

| substance         | $\alpha^\ominus$ | $\frac{-\Delta_{\text{obs}}H/R}{\text{K}}$ | reference |
|-------------------|------------------|--------------------------------------------|-----------|
| HgBr <sub>2</sub> | 0.1              | 0.                                         | see note  |
| ClHgBr            | 0.1              | 0.                                         | see note  |
| BrHgOBr           | 0.1              | 0.                                         | see note  |
| ClHgOBr           | 0.1              | 0.                                         | see note  |

\*Notes:

The temperature dependence of the accommodation coefficients is given by (Jayne et al., 1991):

$$\begin{aligned}\frac{\alpha}{1-\alpha} &= \exp\left(\frac{-\Delta_{\text{obs}}G}{RT}\right) \\ &= \exp\left(\frac{-\Delta_{\text{obs}}H}{RT} + \frac{\Delta_{\text{obs}}S}{R}\right)\end{aligned}$$

where  $\Delta_{\text{obs}}G$  is the Gibbs free energy barrier of the transition state toward solution (Jayne et al., 1991), and  $\Delta_{\text{obs}}H$  and  $\Delta_{\text{obs}}S$  are the corresponding enthalpy and entropy, respectively. The equation can be rearranged to:

$$\ln\left(\frac{\alpha}{1-\alpha}\right) = \frac{-\Delta_{\text{obs}}H}{R} \times \frac{1}{T} + \frac{-\Delta_{\text{obs}}S}{R}$$

and further:

$$\text{d} \ln\left(\frac{\alpha}{1-\alpha}\right) \bigg/ \text{d}\left(\frac{1}{T}\right) = \frac{-\Delta_{\text{obs}}H}{R}$$

If no data were available, a value of  $\alpha = 0.01$ ,  $\alpha = 0.1$ , or  $\alpha = 0.5$ , and a temperature dependence of  $-\Delta_{\text{obs}}H/R = 2000 \text{ K}$  has been assumed.

O<sub>2</sub>: Estimate.

O<sub>3</sub>: Value measured at 292 K.

OH: Value measured at 293 K.

NH<sub>3</sub>: Value measured at 295 K.

NO: Value measured between 193 and 243 K.

NO<sub>2</sub>: Value measured at 298 K.

NO<sub>3</sub>: Value is a lower limit, measured at 273 K.

N<sub>2</sub>O<sub>5</sub>: Value for sulfuric acid, measured between 195 and 300 K.

HONO: Value measured between 247 and 297 K.

HNO<sub>3</sub>: Value measured at room temperature. Abbatt and Waschewsky (1998) say  $\gamma > 0.2$ . Here  $\alpha = 0.5$  is used.

HNO<sub>4</sub>: Value measured at 200 K for water ice.

CH<sub>3</sub>O<sub>2</sub>: Estimate.

HCHO: Value measured between 260 and 270 K.

CO<sub>2</sub>: Estimate.

HCl: Temperature dependence derived from published data at 2 different temperatures

HOCl: Assumed to be the same as  $\alpha(\text{HOBr})$ .

ClNO<sub>3</sub>: Value measured at 274.5 K.

HBr: Temperature dependence derived from published data at 2 different temperatures

HOBr: Value measured at room temperature. Abbatt and Waschewsky (1998) say  $\gamma > 0.2$ . Here  $\alpha = 0.5$  is used.

BrNO<sub>3</sub>: Value measured at 273 K.

BrCl: Assumed to be the same as  $\alpha(\text{Cl}_2)$ .

H<sub>2</sub>SO<sub>4</sub>: Value measured at 303 K.

Hg: Estimate.

HgO: Estimate.

HgCl<sub>2</sub>: Estimate.

HgBr<sub>2</sub>: Estimate.

ClHgBr: Estimate.

BrHgOBr: Estimate.

ClHgOBr: Estimate.

Table 5: Henry’s law equilibria

| # | labels | reaction | rate coefficient | reference |
|---|--------|----------|------------------|-----------|
|---|--------|----------|------------------|-----------|

\*Notes:

The forward (**k\_exf**) and backward (**k\_exb**) rate coefficients are calculated in the file **messy\_mecca\_aero.f90** using the accommodation coefficients in subroutine **mecca\_aero\_alpha** and Henry’s law constants in subroutine **mecca\_aero\_henry**.

$k_{mt}$  = mass transfer coefficient

lwc = liquid water content of aerosol mode

H3201, H6300, H6301, H6302, H7300, H7301, H7302, H7601, H7602: For uptake of  $X$  ( $= \text{N}_2\text{O}_5$ ,  $\text{ClNO}_3$ ,  $\text{BrNO}_3$ ) and subsequent reaction with  $\text{H}_2\text{O}$ ,  $\text{Cl}^-$ , and  $\text{Br}^-$ , we define  $k_{\text{exf}}(X) = k_{\text{mt}}(X) \times \text{lwc} / ([\text{H}_2\text{O}] + 5.0E2[\text{Cl}^-] + 3.0E5[\text{Br}^-])$ .

H6301, H6302, H7601: The total uptake is determined

by  $k_{\text{mt}}(\text{ClNO}_3)$ . The relative rates are assumed to be the same as for  $\text{N}_2\text{O}_5$  (H3201, H6300, H7300).

H7301, H7302, H7602: The total uptake is determined by  $k_{\text{mt}}(\text{BrNO}_3)$ . The relative rates are assumed to be the same as for  $\text{N}_2\text{O}_5$  (H3201, H6300, H7300).

Table 6: Heterogeneous reactions

| #       | labels     | reaction                                                                                | rate coefficient                                                      | reference |
|---------|------------|-----------------------------------------------------------------------------------------|-----------------------------------------------------------------------|-----------|
| HET200  | StHetN     | $\text{N}_2\text{O}_5 + \text{H}_2\text{O} \rightarrow 2 \text{HNO}_3$                  | $\text{khet\_St}(\text{iht\_N2O5\_H2O})$                              | see note  |
| HET201  | TrHetN     | $\text{N}_2\text{O}_5 \rightarrow 2 \text{NO}_3^-(\text{aq}) + 2 \text{H}^+(\text{aq})$ | $\text{khet\_Tr}(\text{iht\_N2O5})$                                   | see note  |
| HET202  | TrHetN     | $\text{HNO}_3 \rightarrow \text{NO}_3^-(\text{aq}) + \text{H}^+(\text{aq})$             | $\text{khet\_Tr}(\text{iht\_HNO3})$                                   | see note  |
| HET410  | StHetCl    | $\text{HOCl} + \text{HCl} \rightarrow \text{Cl}_2 + \text{H}_2\text{O}$                 | $\text{khet\_St}(\text{iht\_HOCl\_HCl})$                              | see note  |
| HET420  | StHetNCl   | $\text{ClNO}_3 + \text{HCl} \rightarrow \text{Cl}_2 + \text{HNO}_3$                     | $\text{khet\_St}(\text{iht\_ClNO3\_HCl})$                             | see note  |
| HET421  | StHetNCl   | $\text{ClNO}_3 + \text{H}_2\text{O} \rightarrow \text{HOCl} + \text{HNO}_3$             | $\text{khet\_St}(\text{iht\_ClNO3\_H2O})$                             | see note  |
| HET422  | StHetNCl   | $\text{N}_2\text{O}_5 + \text{HCl} \rightarrow \text{ClNO}_2 + \text{HNO}_3$            | $\text{khet\_St}(\text{iht\_N2O5\_HCl})$                              | see note  |
| HET510  | StHetBr    | $\text{HOBr} + \text{HBr} \rightarrow \text{Br}_2 + \text{H}_2\text{O}$                 | $\text{khet\_St}(\text{iht\_HOBr\_HBr})$                              | see note  |
| HET520  | StHetNBr   | $\text{BrNO}_3 + \text{H}_2\text{O} \rightarrow \text{HOBr} + \text{HNO}_3$             | $\text{khet\_St}(\text{iht\_BrNO3\_H2O})$                             | see note  |
| HET540  | StHetNClBr | $\text{ClNO}_3 + \text{HBr} \rightarrow \text{BrCl} + \text{HNO}_3$                     | $\text{khet\_St}(\text{iht\_ClNO3\_HBr})$                             | see note  |
| HET541  | StHetNClBr | $\text{BrNO}_3 + \text{HCl} \rightarrow \text{BrCl} + \text{HNO}_3$                     | $\text{khet\_St}(\text{iht\_BrNO3\_HCl})$                             | see note  |
| HET542  | StHetClBr  | $\text{HOCl} + \text{HBr} \rightarrow \text{BrCl} + \text{H}_2\text{O}$                 | $\text{khet\_St}(\text{iht\_HOCl\_HBr})$                              | see note  |
| HET543  | StHetClBr  | $\text{HOBr} + \text{HCl} \rightarrow \text{BrCl} + \text{H}_2\text{O}$                 | $\text{khet\_St}(\text{iht\_HOBr\_HCl})$                              | see note  |
| HET1001 | StTrHetHg  | $\text{Hg} \rightarrow \text{Hg}(\text{aq})$                                            | $\text{khet\_Tr}(\text{iht\_Hg}) + \text{khet\_St}(\text{iht\_Hg})$   | see note  |
| HET1002 | StTrHetHg  | $\text{HgO} \rightarrow \text{Hg}(\text{aq})$                                           | $\text{khet\_Tr}(\text{iht\_RGM}) + \text{khet\_St}(\text{iht\_RGM})$ | see note  |
| HET1003 | StTrHetHg  | $\text{HgCl} \rightarrow \text{Hg}(\text{aq})$                                          | $\text{khet\_Tr}(\text{iht\_RGM}) + \text{khet\_St}(\text{iht\_RGM})$ | see note  |
| HET1004 | StTrHetHg  | $\text{HgCl}_2 \rightarrow \text{Hg}(\text{aq})$                                        | $\text{khet\_Tr}(\text{iht\_RGM}) + \text{khet\_St}(\text{iht\_RGM})$ | see note  |
| HET1005 | StTrHetHg  | $\text{HgBr} \rightarrow \text{Hg}(\text{aq})$                                          | $\text{khet\_Tr}(\text{iht\_RGM}) + \text{khet\_St}(\text{iht\_RGM})$ | see note  |
| HET1006 | StTrHetHg  | $\text{HgBr}_2 \rightarrow \text{Hg}(\text{aq})$                                        | $\text{khet\_Tr}(\text{iht\_RGM}) + \text{khet\_St}(\text{iht\_RGM})$ | see note  |
| HET1007 | StTrHetHg  | $\text{ClHgBr} \rightarrow \text{Hg}(\text{aq})$                                        | $\text{khet\_Tr}(\text{iht\_RGM}) + \text{khet\_St}(\text{iht\_RGM})$ | see note  |
| HET1008 | StTrHetHg  | $\text{BrHgOBr} \rightarrow \text{Hg}(\text{aq})$                                       | $\text{khet\_Tr}(\text{iht\_RGM}) + \text{khet\_St}(\text{iht\_RGM})$ | see note  |
| HET1009 | StTrHetHg  | $\text{ClHgOBr} \rightarrow \text{Hg}(\text{aq})$                                       | $\text{khet\_Tr}(\text{iht\_RGM}) + \text{khet\_St}(\text{iht\_RGM})$ | see note  |

\*Notes:

Heterogeneous reaction rates are calculated with an external module and then supplied to the MECCA chemistry (see [www.messy-interface.org](http://www.messy-interface.org) for details)

Table 7: Acid-base and other equilibria

| # | labels | reaction | $K_0[M^{m-n}]$ | $-\Delta H/R[K]$ | reference |
|---|--------|----------|----------------|------------------|-----------|
|---|--------|----------|----------------|------------------|-----------|

\*Notes:

Table 8: Aqueous phase reactions

| # | labels | reaction | $k_0 [M^{1-n} s^{-1}]$ | $-E_a/R[K]$ | reference |
|---|--------|----------|------------------------|-------------|-----------|
|---|--------|----------|------------------------|-------------|-----------|

\*Notes:

## References

- Abbatt, J. P. D. and Waschewsky, G. C. G.: Heterogeneous interactions of HOBr, HNO<sub>3</sub>, O<sub>3</sub>, and NO<sub>2</sub> with deliquescent NaCl aerosols at room temperature, *J. Phys. Chem. A*, 102, 3719–3725, 1998.
- Anderson, L. C. and Fahey, D. W.: Studies with ClONO<sub>2</sub>: Thermal dissociation rate and catalytic conversion to NO using an NO/O<sub>3</sub> chemiluminescence detector, *J. Phys. Chem.*, 94, 644–652, 1990.
- Aranda, A., Le Bras, G., La Verdet, G., and Poulet, G.: The BrO + CH<sub>3</sub>O<sub>2</sub> reaction: Kinetics and role in the atmospheric ozone budget, *Geophys. Res. Lett.*, 24, 2745–2748, 1997.
- Ariya, P. A., Khalizov, A., and Gidas, A.: Reactions of gaseous mercury with atomic and molecular halogens: Kinetics, product studies, and atmospheric implications, *J. Phys. Chem. A*, 106, 7310–7320, 2002.
- Atkinson, R.: Gas-phase tropospheric chemistry of volatile organic compounds: 1. Alkanes and alkenes, *J. Phys. Chem. Ref. Data*, 26, 215–290, 1997.
- Atkinson, R.: Kinetics of the gas-phase reactions of OH radicals with alkanes and cycloalkanes, *Atmos. Chem. Phys.*, 3, 2233–2307, 2003.
- Atkinson, R., Baulch, D. L., Cox, R. A., Hampson, Jr., R. F., Kerr, J. A., Rossi, M. J., and Troe, J.: Summary of evaluated kinetic and photochemical data for atmospheric chemistry: Web version August 1999, <http://www.iupac-kinetic.ch.cam.ac.uk/>, 1999.
- Atkinson, R., Baulch, D. L., Cox, R. A., Crowley, J. N., Hampson, R. F., Hynes, R. G., Jenkin, M. E., Rossi, M. J., and Troe, J.: Evaluated kinetic and photochemical data for atmospheric chemistry: Volume I – gas phase reactions of O<sub>x</sub>, HO<sub>x</sub>, NO<sub>x</sub> and SO<sub>x</sub> species, *Atmos. Chem. Phys.*, 4, 1461–1738, 2004.
- Atkinson, R., Baulch, D. L., Cox, R. A., Crowley, J. N., Hampson, Jr., R. F., Hynes, R. G., Jenkin, M. E., Kerr, J. A., Rossi, M. J., and Troe, J.: Summary of evaluated kinetic and photochemical data for atmospheric chemistry: Web version March 2005, <http://www.iupac-kinetic.ch.cam.ac.uk/>, 2005.
- Atkinson, R., Baulch, D. L., Cox, R. A., Crowley, J. N., Hampson, R. F., Hynes, R. G., Jenkin, M. E., Rossi, M. J., and Troe, J.: Evaluated kinetic and photochemical data for atmospheric chemistry: Volume II – gas phase reactions of organic species, *Atmos. Chem. Phys.*, 6, 3625–4055, 2006.
- Atkinson, R., Baulch, D. L., Cox, R. A., Crowley, J. N., Hampson, R. F., Hynes, R. G., Jenkin, M. E., Rossi, M. J., and Troe, J.: Evaluated kinetic and photochemical data for atmospheric chemistry: Volume III – gas phase reactions of inorganic halogens, *Atmos. Chem. Phys.*, 7, 981–1191, 2007.
- Barone, S. B., Turnipseed, A. A., and Ravishankara, A. R.: Role of adducts in the atmospheric oxidation of dimethyl sulfide, *Faraday Discuss.*, 100, 39–54, 1995.
- Bartlett, W. P. and Margerum, D. W.: Temperature dependencies of the Henry’s law constant and the aqueous phase dissociation constant of bromine chloride, *Environ. Sci. Technol.*, 33, 3410–3414, 1999.
- Boyd, A. A., Flaud, P.-M., Daugey, N., and Lesclaux, R.: Rate constants for RO<sub>2</sub> + HO<sub>2</sub> reactions measured under a large excess of HO<sub>2</sub>, *J. Phys. Chem. A*, 107, 818–821, 2003.
- Brimblecombe, P. and Clegg, S. L.: Erratum, *J. Atmos. Chem.*, 8, 95, 1989.
- Burkholder, J. B., Orlando, J. J., and Howard, C. J.: Ultraviolet absorption cross sections of Cl<sub>2</sub>O<sub>2</sub> between 210 and 410 nm, *J. Phys. Chem.*, 94, 687–695, 1990.
- Calvert, J. G. and Lindberg, S. E.: A modeling study of the mechanism of the halogen-ozone-mercury homogeneous reactions in the troposphere during the polar spring, *Atmos. Environ.*, 37, 4467–4481, 2003.
- Canosa-Mas, C. E., King, M. D., Lopez, R., Percival, C. J., Wayne, R. P., Shallcross, D. E., Pyle, J. A., and Daele, V.: Is the reaction between CH<sub>3</sub>(O)O<sub>2</sub> and NO<sub>3</sub> important in the night-time troposphere?, *J. Chem. Soc. Faraday Trans.*, 92, 2211–2222, 1996.
- Chameides, W. L.: The photochemistry of a remote marine stratiform cloud, *J. Geophys. Res.*, 89D, 4739–4755, 1984.
- Christensen, L. E., Okumura, M., Sander, S. P., Salawitch, R. J., Toon, G. C., Sen, B., Blavier, J.-F., and Jucks, K. W.: Kinetics of HO<sub>2</sub> + HO<sub>2</sub> → H<sub>2</sub>O<sub>2</sub> + O<sub>2</sub>: Implications for stratospheric H<sub>2</sub>O<sub>2</sub>, *Geophys. Res. Lett.*, 29, doi:10.1029/2001GL014525, 2002.
- Davis, Jr., W. and de Bruin, H. J.: New activity coefficients of 0–100 per cent aqueous nitric acid, *J. Inorg. Nucl. Chem.*, 26, 1069–1083, 1964.
- De Bruyn, W. J., Shorter, J. A., Davidovits, P., Worsnop, D. R., Zahniser, M. S., and Kolb, C. E.: Uptake of gas-phase sulfur species methanesulfonic acid, dimethylsulfoxide, and dimethyl sulfone by aqueous surfaces, *J. Geophys. Res.*, 99D, 16927–16932, 1994.
- Deiber, G., George, C., Le Calvé, S., Schweitzer, F., and Mirabel, P.: Uptake study of ClONO<sub>2</sub> and BrONO<sub>2</sub> by halide containing droplets, *Atmos. Chem. Phys.*, 4, 1291–1299, 2004.

- DeMore, W. B., Sander, S. P., Golden, D. M., Hampson, R. F., Kurylo, M. J., Howard, C. J., Ravishankara, A. R., Kolb, C. E., and Molina, M. J.: Chemical kinetics and photochemical data for use in stratospheric modeling. Evaluation number 12, JPL Publication 97-4, Jet Propulsion Laboratory, Pasadena, CA, 1997.
- Dillon, T. J., Horowitz, A., Hölscher, D., Crowley, J. N., Vereecken, L., and Peeters, J.: Reaction of HO with hydroxyacetone ( $\text{HOCH}_2\text{C}(\text{O})\text{CH}_3$ ): rate coefficients (233-363 K) and mechanism, *Phys. Chem. Chem. Phys.*, 8, 236–246, 2006.
- Donohoue, D. L., Bauer, D., Cossairt, B., and Hynes, A. J.: Temperature and pressure dependent rate coefficients for the reaction of Hg with Br and the reaction of Br with Br: a pulsed laser photolysis-pulsed laser induced fluorescence study, *J. Phys. Chem. A*, 110, 6623–6632, 2006.
- Hanson, D. R., Burkholder, J. B., Howard, C. J., and Ravishankara, A. R.: Measurement of OH and  $\text{HO}_2$  radical uptake coefficients on water and sulfuric acid surfaces, *J. Phys. Chem.*, 96, 4979–4985, 1992.
- Hu, J. H., Shi, Q., Davidovits, P., Worsnop, D. R., Zahniser, M. S., and Kolb, C. E.: Reactive uptake of  $\text{Cl}_2(\text{g})$  and  $\text{Br}_2(\text{g})$  by aqueous surfaces as a function of  $\text{Br}^-$  and  $\text{I}^-$  ion concentration: The effect of chemical reaction at the interface, *J. Phys. Chem.*, 99, 8768–8776, 1995.
- Huthwelker, T., Clegg, S. L., Peter, T., Carslaw, K., Luo, B. P., and Brimblecombe, P.: Solubility of  $\text{HOCl}$  in water and aqueous  $\text{H}_2\text{SO}_4$  to stratospheric temperatures, *J. Atmos. Chem.*, 21, 81–95, 1995.
- Hynes, A. J. and Wine, P. H.: The atmospheric chemistry of dimethylsulfoxide (DMSO) kinetics and mechanism of the OH + DMSO reaction, *J. Atmos. Chem.*, 24, 23–37, 1996.
- Ingham, T., Bauer, D., Sander, R., Crutzen, P. J., and Crowley, J. N.: Kinetics and products of the reactions  $\text{BrO} + \text{DMS}$  and  $\text{Br} + \text{DMS}$  at 298 K, *J. Phys. Chem. A*, 103, 7199–7209, 1999.
- Jacob, D. J.: Chemistry of OH in remote clouds and its role in the production of formic acid and peroxy-monosulfate, *J. Geophys. Res.*, 91D, 9807–9826, 1986.
- Jayne, J. T., Duan, S. X., Davidovits, P., Worsnop, D. R., Zahniser, M. S., and Kolb, C. E.: Uptake of gas-phase alcohol and organic acid molecules by water surfaces, *J. Phys. Chem.*, 95, 6329–6336, 1991.
- Jefferson, A., Nicovich, J. M., and Wine, P. H.: Temperature-dependent kinetics studies of the reactions  $\text{Br}(^2\text{P}_{3/2}) + \text{CH}_3\text{SCH}_3 \leftrightarrow \text{CH}_3\text{SCH}_2 + \text{HBr}$ . Heat of formation of the  $\text{CH}_3\text{SCH}_2$  radical, *J. Phys. Chem.*, 98, 7128–7135, 1994.
- Kircher, C. C. and Sander, S. P.: Kinetics and mechanism of  $\text{HO}_2$  and  $\text{DO}_2$  disproportionations, *J. Phys. Chem.*, 88, 2082–2091, 1984.
- Kirchner, F. and Stockwell, W. R.: Effect of peroxy radical reactions on the predicted concentrations of ozone, nitrogenous compounds, and radicals, *J. Geophys. Res.*, 101D, 21 007–21 022, 1996.
- Kohlmann, J.-P. and Poppe, D.: The tropospheric gas-phase degradation of  $\text{NH}_3$  and its impact on the formation of  $\text{N}_2\text{O}$  and  $\text{NO}_x$ , *J. Atmos. Chem.*, 32, 397–415, 1999.
- Lax, E.: Taschenbuch für Chemiker und Physiker, Springer Verlag, Berlin, 1969.
- Lee, Y.-N. and Schwartz, S. E.: Reaction kinetics of nitrogen dioxide with liquid water at low partial pressure, *J. Phys. Chem.*, 85, 840–848, 1981.
- Lind, J. A. and Kok, G. L.: Correction to “Henry’s law determinations for aqueous solutions of hydrogen peroxide, methylhydroperoxide, and peroxyacetic acid” by John A. Lind and Gregory L. Kok, *J. Geophys. Res.*, 99D, 21 119, 1994.
- Madronich, S. and Calvert, J. G.: Permutation reactions of organic peroxy radicals in the troposphere, *J. Geophys. Res.*, 95D, 5697–5715, 1990.
- Magi, L., Schweitzer, F., Pallares, C., Cherif, S., , Mirabel, P., and George, C.: Investigation of the uptake rate of ozone and methyl hydroperoxide by water surfaces, *J. Phys. Chem. A*, 101, 4943–4949, 1997.
- Mallard, W. G., Westley, F., Herron, J. T., Hampson, R. F., and Frizzel, D. H.: NIST Chemical Kinetics Database: Version 5.0, National Institute of Standards and Technology, Gaithersburg, MD, 1993.
- McCabe, D. C., Gierczak, T., Talukdar, R. K., and Ravishankara, A. R.: Kinetics of the reaction  $\text{OH} + \text{CO}$  under atmospheric conditions, *Geophys. Res. Lett.*, 28, 3135–3138, 2001.
- Müller, J.-F. and Brasseur, G.: IMAGES: A three-dimensional chemical transport model of the global troposphere, *J. Geophys. Res.*, 100D, 16 445–16 490, 1995.
- Neeb, P., Horie, O., and Moortgat, G. K.: The ethene-ozone reaction in the gas phase, *J. Phys. Chem. A*, 102, 6778–6785, 1998.
- Orlando, J. J. and Tyndall, G. S.: Rate coefficients for the thermal decomposition of  $\text{BrONO}_2$  and the heat of formation of  $\text{BrONO}_2$ , *J. Phys. Chem.*, 100, 19 398–19 405, 1996.

- Orlando, J. J., Tyndall, G. S., Bertman, S. B., Chen, W., and Burkholder, J. B.: Rate coefficient for the reaction of OH with  $\text{CH}_2=\text{C}(\text{CH}_3)\text{C}(\text{O})\text{OONO}_2$  (MPAN), *Atmos. Environ.*, 36, 1895–1900, 2002.
- Ponche, J. L., George, C., and Mirabel, P.: Mass transfer at the air/water interface: Mass accommodation coefficients of  $\text{SO}_2$ ,  $\text{HNO}_3$ ,  $\text{NO}_2$  and  $\text{NH}_3$ , *J. Atmos. Chem.*, 16, 1–21, 1993.
- Pöschl, U., Canagaratna, M., Jayne, J. T., Molina, L. T., Worsnop, D. R., Kolb, C. E., and Molina, M. J.: Mass accommodation coefficient of  $\text{H}_2\text{SO}_4$  vapor on aqueous sulfuric acid surfaces and gaseous diffusion coefficient of  $\text{H}_2\text{SO}_4$  in  $\text{N}_2/\text{H}_2\text{O}$ , *J. Phys. Chem. A*, 102, 10082–10089, 1998.
- Pöschl, U., von Kuhlmann, R., Poisson, N., and Crutzen, P. J.: Development and intercomparison of condensed isoprene oxidation mechanisms for global atmospheric modeling, *J. Atmos. Chem.*, 37, 29–52, 2000.
- Raofie, F. and Ariya, P. A.: Kinetics and products study of the reaction of BrO radicals with gaseous mercury, *J. Phys. IV France*, 107, 1119–1121, 2003.
- Régimbal, J.-M. and Mozurkewich, M.: Peroxynitric acid decay mechanisms and kinetics at low pH, *J. Phys. Chem. A*, 101, 8822–8829, 1997.
- Rudich, Y., Talukdar, R. K., Imamura, T., Fox, R. W., and Ravishankara, A. R.: Uptake of  $\text{NO}_3$  on KI solutions: Rate coefficient for the  $\text{NO}_3 + \text{I}^-$  reaction and gas-phase diffusion coefficients for  $\text{NO}_3$ , *Chem. Phys. Lett.*, 261, 467–473, 1996.
- Saastad, O. W., Ellermann, T., and Nielsen, C. J.: On the adsorption of NO and  $\text{NO}_2$  on cold  $\text{H}_2\text{O}/\text{H}_2\text{SO}_4$  surfaces, *Geophys. Res. Lett.*, 20, 1191–1193, 1993.
- Sander, S. P., Friedl, R. R., DeMore, W. B., Golden, D. M., Kurylo, M. J., Hampson, R. F., Huie, R. E., Moortgat, G. K., Ravishankara, A. R., Kolb, C. E., and Molina, M. J.: Chemical kinetics and photochemical data for use in stratospheric modeling. Supplement to evaluation 12: Update of key reactions. Evaluation number 13, JPL Publication 00-3, Jet Propulsion Laboratory, Pasadena, CA, <http://jpldataeval.jpl.nasa.gov/>, 2000.
- Sander, S. P., Finlayson-Pitts, B. J., Friedl, R. R., Golden, D. M., Huie, R. E., Kolb, C. E., Kurylo, M. J., Molina, M. J., Moortgat, G. K., Orkin, V. L., and Ravishankara, A. R.: Chemical Kinetics and Photochemical Data for Use in Atmospheric Studies, Evaluation Number 14, JPL Publication 02-25, Jet Propulsion Laboratory, Pasadena, CA, 2003.
- Sander, S. P., Friedl, R. R., Golden, D. M., Kurylo, M. J., Moortgat, G. K., Keller-Rudek, H., Wine, P. H., Ravishankara, A. R., Kolb, C. E., Molina, M. J., Finlayson-Pitts, B. J., Huie, R. E., and Orkin, V. L.: Chemical Kinetics and Photochemical Data for Use in Atmospheric Studies, Evaluation Number 15, JPL Publication 06-2, Jet Propulsion Laboratory, Pasadena, CA, 2006.
- Schroeder, W. H. and Munthe, J.: Atmospheric mercury — An overview, *Atmos. Environ.*, 32, 809–822, 1998.
- Schwartz, S. E. and White, W. H.: Solubility equilibria of the nitrogen oxides and oxyacids in dilute aqueous solution, in: *Advances in Environmental Science and Engineering*, edited by Pfafflin, J. R. and Ziegler, E. N., vol. 4, pp. 1–45, Gordon and Breach Science Publishers, NY, 1981.
- Schweitzer, F., Mirabel, P., and George, C.: Uptake of hydrogen halides by water droplets, *J. Phys. Chem. A*, 104, 72–76, 2000.
- Shon, Z.-H., Kim, K.-H., Kim, M.-Y., and Lee, M.: Modeling study of reactive gaseous mercury in the urban air, *Atmos. Environ.*, 39, 749–761, 2005.
- Sivakumaran, V., Hölscher, D., Dillon, T. J., and Crowley, J. N.: Reaction between OH and HCHO: temperature dependent rate coefficients (202–399 K) and product pathways (298 K), *Phys. Chem. Chem. Phys.*, 5, 4821–4827, 2003.
- Sprengnether, M., Demerjian, K. L., Donahue, N. M., and Anderson, J. G.: Product analysis of the OH oxidation of isoprene and 1,3-butadiene in the presence of NO, *J. Geophys. Res.*, 107D, doi:10.1029/2001JD000716, 2002.
- Stimpfle, R. M., Wilmouth, D. M., Salawitch, R. J., and Anderson, J. G.: First measurements of  $\text{ClOOCl}$  in the stratosphere: The coupling of  $\text{ClOOCl}$  and  $\text{ClO}$  in the Arctic polar vortex, *J. Geophys. Res.*, 109, doi:10.1029/2003JD003811, 2004.
- Takami, A., Kato, S., Shimono, A., and Koda, S.: Uptake coefficient of OH radical on aqueous surface, *Chem. Phys.*, 231, 215–227, 1998.
- Thomas, K., Volz-Thomas, A., and Kley, D.: Zur Wechselwirkung von  $\text{NO}_3$ -Radikalen mit wässrigen Lösungen: Bestimmung des Henry- und des Massennakkomodationskoeffizienten, Ph.D. thesis, Institut für Chemie und Dynamik der Geosphäre 2, Forschungszentrum Jülich GmbH, Germany, 1993.
- Thornton, J. and Abbatt, J. P. D.: Measurements of  $\text{HO}_2$  uptake to aqueous aerosol: Mass accommodation coefficients and net reactive loss, *J. Geophys. Res.*, 110D, doi:10.1029/2004JD005402, 2005.

- Tyndall, G. S., Staffelbach, T. A., Orlando, J. J., and Calvert, J. G.: Rate coefficients for the reactions of OH radicals with methylglyoxal and acetaldehyde, *Int. J. Chem. Kinetics*, 27, 1009–1020, 1995.
- Tyndall, G. S., Cox, R. A., Granier, C., Lesclaux, R., Moortgat, G. K., Pilling, M. J., Ravishankara, A. R., and Wallington, T. J.: The atmospheric chemistry of small organic peroxy radicals, *J. Geophys. Res.*, 106D, 12 157–12 182, 2001.
- Villenave, E. and Lesclaux, R.: Kinetics of the cross reactions of  $\text{CH}_3\text{O}_2$  and  $\text{C}_2\text{H}_5\text{O}_2$  radicals with selected peroxy radicals, *J. Phys. Chem.*, 100, 14 372–14 382, 1996.
- Vogt, R., Crutzen, P. J., and Sander, R.: A mechanism for halogen release from sea-salt aerosol in the remote marine boundary layer, *Nature*, 383, 327–330, doi:10.1038/383327A0, 1996.
- von Kuhlmann, R.: Tropospheric photochemistry of ozone, its precursors and the hydroxyl radical: A 3D-modeling study considering non-methane hydrocarbons, Ph.D. thesis, Johannes Gutenberg-Universität, Mainz, Germany, 2001.
- Wilhelm, E., Battino, R., and Wilcock, R. J.: Low-pressure solubility of gases in liquid water, *Chem. Rev.*, 77, 219–262, 1977.
- Worsnop, D. R., Zahniser, M. S., Kolb, C. E., Gardner, J. A., Watson, L. R., van Doren, J. M., Jayne, J. T., and Davidovits, P.: The temperature dependence of mass accommodation of  $\text{SO}_2$  and  $\text{H}_2\text{O}_2$  on aqueous surfaces, *J. Phys. Chem.*, 93, 1159–1172, 1989.
- Zaveri, R. A. and Peters, L. K.: A new lumped structure photochemical mechanism for large-scale applications, *J. Geophys. Res.*, 104D, 30 387–30 415, 1999.
