# Supplementary material for: Development cycle 2 of the Modular Earth Submodel System (MESSy2)
Source: Copernicus journal article supplement (doi:10.5194/gmd-3-717-2010), 2010-12-22
Supplement: Supplementary file 1 [file gmd-3-717-2010-supplement.zip › MESSy2_timer_manual.pdf]

# MESSy TIMER User Manual

*for the MESSy TIMER submodel*

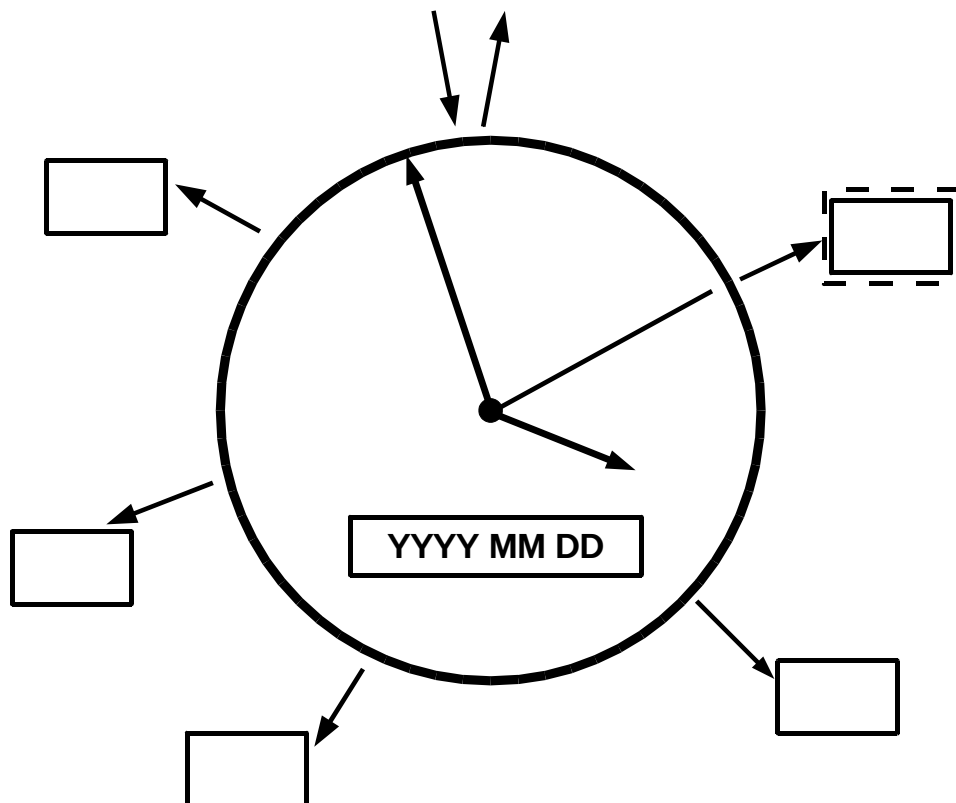

Astrid Kerkweg<sup>1</sup>, Hella Riede<sup>2</sup> & Patrick Jöckel<sup>2,3</sup>

<sup>1</sup>Institute for Atmospheric Physics, Johannes Gutenberg University Mainz 55099 Mainz, Germany  
kerkweg@uni-mainz.de

<sup>2</sup> Air Chemistry Department, Max-Planck Institute of Chemistry, PO Box 3060, 55020 Mainz, Germany

<sup>3</sup> now at Deutsches Zentrum für Luft- und Raumfahrt, Institut für Physik der Atmosphäre, Oberpfaffenhofen, 82230 Wessling, Germany

This manual is part of the electronic supplement of our article “Development Cycle 2 of the Modular Earth Submodel System (MESSy2)” in Geosci. Model Dev. (2010), available at: <http://www.geoscientific-model-development.net>

Date: November 27, 2010

# Contents

|          |                                                      |           |
|----------|------------------------------------------------------|-----------|
| <b>1</b> | <b>Introduction</b>                                  | <b>3</b>  |
| <b>2</b> | <b>TIMER basics</b>                                  | <b>3</b>  |
| 2.1      | Representation of date and time . . . . .            | 3         |
| 2.2      | Predefined variables . . . . .                       | 3         |
| 2.2.1    | Dates and times . . . . .                            | 3         |
| 2.2.2    | LOGICALs for model control . . . . .                 | 4         |
| 2.2.3    | Other variables . . . . .                            | 4         |
| 2.3      | TIMER subroutines and functions . . . . .            | 5         |
| 2.3.1    | TIMER routines called from the BML or BMIL . . . . . | 5         |
| 2.3.2    | Subroutines for date manipulations . . . . .         | 6         |
| 2.4      | Additional tools . . . . .                           | 6         |
| <b>3</b> | <b>The TIME MANAGER</b>                              | <b>6</b>  |
| 3.1      | Basic structure and subroutines . . . . .            | 6         |
| 3.2      | The heart beat of the TIME MANAGER . . . . .         | 7         |
| <b>4</b> | <b>The EVENT MANAGER</b>                             | <b>7</b>  |
| 4.1      | The definition of an event . . . . .                 | 7         |
| 4.2      | How to define an event? . . . . .                    | 9         |
| 4.3      | How to inquire an event? . . . . .                   | 10        |
| 4.4      | The restart event . . . . .                          | 10        |
| 4.5      | Subroutines used internally . . . . .                | 10        |
| <b>5</b> | <b>The TIMER namelist</b>                            | <b>11</b> |
| <b>6</b> | <b>The TIMER BMIL ROUTINES</b>                       | <b>11</b> |
|          | <b>References</b>                                    | <b>12</b> |

# 1 Introduction

The MESSy (Jöckel et al., 2005) generic submodel TIMER is partly based on the time management routines of ECHAM5 (Roeckner et al., 2003, 2004, 2006). The TIMER provides the timing information for the MESSy submodels and either replaces or mirrors the timing information of the basemodel. In the first case, the initialisation of the basemodel time information is overwritten by the TIMER namelist. In the second case, the TIMER is initialised by the basemodel. The submodel core layer (SMCL) of the TIMER consists of three Fortran95 modules:

- `messy_main_timer.f90` provides
  - the basic type structure to store date and time information,
  - the basic variables to store date and time information,
  - tools (functions and subroutines) for date and time format conversions, time span calculations, etc.
- `messy_main_timer_manager.f90` provides the internal clock for the model simulation. It manages the time stepping and the date and time information during the simulation.
- `messy_main_timer_event.f90` provides data types and routines to schedule processes at specific (regular) time intervals, e.g., to trigger regular output or input.

In addition the basemodel interface layer (BMIL) module `messy_main_timer_bi.f90` provides the connection to the basemodel.

Figure 1 sketches the relationship between the different Fortran95 modules of TIMER.

## 2 TIMER basics

### 2.1 Representation of date and time

There are two ways to represent a specific date and time within TIMER. Internally all dates are stored in a Fortran95 structure `time_days` as follows:

```
TYPE, PUBLIC :: time_days
!
! relative calendar date
!               and time format
!
! time_days [structure]
!
```

```
!   day   [integer]
!   (day in calendar,
!   -2147483648 ... 2147483647
!   approx. +/-5.8 Mio. years)
!
!   second [integer]
!   (seconds of day, 0,...,86399)
!
!PRIVATE
LOGICAL :: init   = .FALSE.
INTEGER :: day    = 0
INTEGER :: second = 0
END TYPE time_days
```

This structure contains the two INTEGER components `day` and `second` and in addition the LOGICAL component `init`, which indicates whether the date is already initialised (`.TRUE.`) or not (`.FALSE.`).

The second representation of a date is the more descriptive form by six INTEGER components for the year, month, day, hour, minute and second, respectively. For instance, the date “10.11.2012 09:14:06” is described by YEAR=2012; MONTH=11; DAY=10; HOUR=9; MINUTE=14; SECOND=6.

### 2.2 Predefined variables

The TIMER provides predefined variables including some important date variables, which are updated at the beginning of each simulation time step and which are to be used by ordinary submodels. Usage of these variables prevents the multiple re-calculation of the same information within one time step. Additionally, some important switches (of TYPE LOGICAL) are defined, which are required for model run control.

#### 2.2.1 Dates and times

The predefined dates (of TYPE `time_days`) provided by the TIMER are:

- `start_date`: the date and time of the simulation start,
- `stop_date`: the date and time at which the simulation finishes,
- `resume_date`: the date and time at which the simulation was resumed after a restart,
- `current_date`: the date and time of the current model time step,
- `previous_date`: the date and time of the previous model time step,
- `next_date`: the date and time of the next model time step.

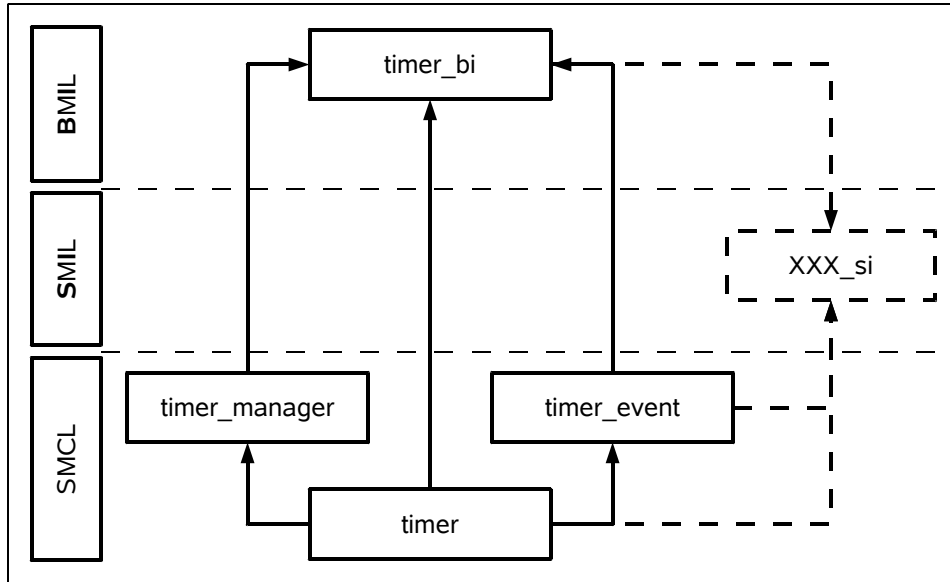

Figure 1: Relationship between the various Fortran95 modules of TIMER: The boxes with horizontal text represent the different Fortran95 modules of TIMER, the corresponding filenames are `messy_main_XX.f90`, where *XX* is the respective box text. The arrows indicate where the different modules are USED. The dashed box with **XXX** denotes an ordinary submodel, which makes use of the TIMER. The different MESSy layers are indicated on the left side (SMCL: submodel core layer; SMIL: submodel interface layer; BMIL: basemodel interface layer) and by the module names (si = SMIL, bi = BMIL).

### 2.2.2 LOGICALS for model control

The predefined switches (of TYPE LOGICAL) provided by the TIMER are:

- `lstart` is `.TRUE.` during the initialisation phase and the very first time step of a simulation.
- `lresume` is `.TRUE.` during the initialisation phase and the first time step after a model restart.
- `lfirst_cycle` is `.TRUE.` if `lstart` or `lresume` are `.TRUE.`.
- `lbreak` is `.TRUE.` during the last time step before a simulation will be interrupted (for later restart).
- `lstop` is `.TRUE.` during the last time step before the end of the model simulation.
- `l_rerun` is `.TRUE.` when restart files are to be written (see Sect. 4.4).
- `l_trigger_restart` is `.TRUE.` when a restart is triggered by the generic submodel QTIMER.
- `labort` is set in the namelist. In case of `.TRUE.`, the model simulation will be finished after a break, even if `stop_date` is not reached. In other words, this switch prevents that after a model break the next job is submitted to the scheduler of the computer.
- `lforcedtime` indicates that the date and restart setting as defined in the namelist are overwritten by an external source. In TIMER itself the LOGICAL is used in `main_timer_global_start` to prevent the setting of `l_rerun` (as this also needs to be determined consistently by the external source).

### 2.2.3 Other variables

Some other variables are defined by TIMER as well:

- The INTEGER `CAL_TYPE` defines the calendar type. Currently, two calendar types are implemented: The Julian calendar identified by the INTEGER PARAMETER `CAL_JULIAN` and a 360 day per year calendar (INTEGER PARAMETER `CAL_360D`). Note: the 360 day calendar option is implemented, but was NOT extensively tested.
- `INIT_STEP` is the position (step number) of the time manager (see Sect. 3) at model simulation start.
- `delta_time` is the interval between two model time steps in seconds.
- `time_step_len` is the length of the integration time step, which depends on the integration scheme; e.g., a leap frog scheme uses a time step which is twice the interval of a model time step, whereas for a Runge-Kutta scheme the integration time step is equal to the time interval `delta_time`.

- `YEAR`, `MONTH`, `DAY`, `HOURL`, `MINUTE`, `SECOND` contain the components of `current_date` as six `INTEGER` variables (Sect. 2.2.1).
- `YEAR_START`, `MONTH_START`, `DAY_START`, `HOURL_START`, `MINUTE_START`, `SECOND_START` contain the components of `start_date` as six `INTEGER` variables.
- `YEAR_NEXT`, `MONTH_NEXT`, `DAY_NEXT`, `HOURL_NEXT`, `MINUTE_NEXT`, `SECOND_NEXT` contain the components of `next_date` as six `INTEGER` variables.
- `current_time_step` is of type `INTEGER` and equal to the position of `time_manager` (see Sect. 3), which is the up-to-date count of the model time step.
- `CMONTHS` is a `CHARACTER ARRAY` of dimension 12, which contains the three letter strings indicating the 12 months ( 'Jan', 'Feb', 'Mar', 'Apr', 'May', 'Jun', 'Jul', 'Aug', 'Sep', 'Oct', 'Nov', 'Dec').
- `no_cycles` gives the number of how often restart files are written without interrupting the simulation (see Sect. 4.4).
- `DAYOFYEAR` gives the number of the day in the current year, e.g., 1 Feb = 32.

## 2.3 TIMER subroutines and functions

TIMER provides a lot of tools to handle dates and times and to simplify time calculations in other submodels.

### 2.3.1 TIMER routines called from the BML or BMIL

A special class of subroutines are those used to initialise the TIMER by the basemodel (from the basemodel interface layer) or to initialise the basemodel time control by TIMER. Their names start all with `timer_`.

- `timer_set_date` sets a date in TYPE `time_days` format. The routine is fourfold overloaded. To define an arbitrary date the date to be set is parameter to the subroutine. For the six specific dates listed in Sect. 2.2.1, alternatively a string can be specified (i.e., 'start', 'stop', 'resume', 'current', 'previous', 'next').

Input for date definition are either 6 `INTEGER`s defining the date (year, month, day, hour, minute, second) or 2 `INTEGER`s giving the day and the second according to the TYPE `time_days` format.

In case of 'start' not only the `start_date` will be set but also the `INTEGER`s `YEAR_START`, `MONTH_START`, `DAY_START`, `HOURL_START`, `MINUTE_START`, `SECOND_START` and `JULIAN_DATE_START`.

Examples:

```
CALL timer_set_date(status, 'resume' &
, my_year, my_month, my_day &
, my_hour, my_minute, my_second)
or
CALL timer_set_date(status, 'resume' &
, date_day, date_second)
or
CALL timer_set_date(status, my_date &
, my_year, my_month, my_day &
, my_hour, my_minute, my_second)
or
CALL timer_set_date(status, my_date &
, date_day, date_second),
when my_date is of TYPE time_days and date_day
and date_second are of TYPE time_days.
```

- `timer_get_date` returns the six components of a date, namely year, month, day, hour, minute, second for an arbitrary date in `time_days` format. Alternatively, the six date components of the specific dates listed in section 2.2.1 can be retrieved by specifying their name (i.e., 'start', 'stop', 'resume', 'current', 'previous', 'next').

Examples:

```
CALL timer_get_date(status, 'resume' &
, my_year, my_month, my_day &
, my_hour, my_minute, my_second)
or
CALL timer_get_date(status, my_date &
, my_year, my_month, my_day &
, my_hour, my_minute, my_second),
when my_date is of TYPE time_days.
```

- `timer_set_calendar` sets the calendar type of the TIMER.
- `timer_get_calendar` returns information about the calendar type of TIMER.
- `timer_set_delta_time` sets the `delta_time` of the TIMER MANAGER (see Sect. 3).
- `timer_get_delta_time` returns the `delta_time` of the TIMER MANAGER (see Sect. 3).
- `timer_rewind_manager` rewinds the `time_manager` (see Sect. 3).
- `timer_add_date` adds a time interval in seconds to a date specified by its six components and returns the new date in date components.
- `timer_set_lresume` sets the LOGICAL `lresume`.
- `timer_get_lresume` returns the LOGICAL `lresume` from the TIMER.
- `timer_set_time_step_len` sets the `INTEGER` `time_step_len`.

- `timer_set_no_cycles` sets the `INTEGER no_cycles`.
- `timer_get_no_cycles` returns the `INTEGER no_cycles` from `TIMER`.
- `timer_set_labort` sets the `LOGICAL labort`.
- `timer_get_labort` returns the `LOGICAL labort` from `TIMER`.
- `timer_set_rerun_event` defines the `TIMER rerun_event` (see Sect. 4.4).
- `timer_get_rerun_event` provides the information about the `TIMER rerun_event` (see Sect. 4.4) as given in the `TIMER` namelist to the basemodel.
- `timer_message` provides an error message for a given error status.

Additionally, the `FUNCTION timer_get_time_step` returns the position of the `time_manager` (see Sect. 3), i.e., the model time step.

### 2.3.2 Subroutines for date manipulations

- `date_set` sets a date in the `time_days` format by specifying the 2 `INTEGERs` `day` and `second` of the `time_days` format.
- `date_set_components` sets a date in the `time_days` format by specifying the 6 date components (year, month, day, hour, minute, second).
- `date_get` returns the 2 `INTEGERs` `day` and `second` of a date given as `TYPE time_days`.
- `date_get_components` returns the 6 date components of a date of `TYPE time_days`.
- `add_date` add days and seconds to a date of `TYPE time_days`.
- `copy_date` copies a date of `TYPE time_days` into another variable of `TYPE time_days`.
- `if_less` compares two dates of `TYPE time_days`. A `LOGICAL` is set to `.TRUE.`, if the first date is earlier than the second date.
- `if_equal` compares two dates of `TYPE time_days`. A `LOGICAL` is set to `.TRUE.`, if both dates are equal.
- `is_init` returns the `LOGICAL` part of the `TYPE time_days` indicating if the date is initialised.
- `print_date` / `write_date` write a date of `TYPE time_days` to standard output. `write_date` is the routine on `BMIL` level which calls the `SMCL` routines `print_date` or `print_date_components`.
- `print_date_components` writes the six date components of a date of `TYPE time_days` to standard output.

## 2.4 Additional tools

- `MonthLength` is a function to calculate the length of a month in days depending on the calendar type.
- `JulianMonthLength` is a function to calculate the length of a Julian month in days.
- `YearLength` is a function to calculate the length of a year in days depending on the calendar type.
- `JulianYearLength` is a function to calculate the length of a Julian year in days.
- `YearDay` is a function to calculate the number of a day in the current year depending on the calendar type.
- `julian_day` is a function to calculate the Julian day number for a Gregorian date (specified as year, month and day).
- `time_span_s` is a function to calculate the time difference in seconds between two Gregorian dates.
- `time_span_d` is a function to calculate the time difference in days between two Gregorian dates.
- `gregor2julian` converts a Gregorian date and time to the corresponding Julian date and fraction of the day.
- `julian2gregor` converts a Julian date and fraction of the day to the corresponding Gregorian date and time.
- `utc2lt` converts the time of day in UTC into local time for a given longitude.
- `eval_time_str` cracks common netcdf time string format (e.g. 'seconds since 2000-01-01 00:00:00') into date components.

Note: Only the non-Julian subroutines should be used to get proper results when applying the 360-days calendar.

## 3 The TIME MANAGER

The `TIME MANAGER` is the central unit for the time information of the model.

### 3.1 Basic structure and subroutines

The Fortran95 structure `time_manager` contains all information to unambiguously determine the time within a simulation:

```

TYPE time_manager
  PRIVATE ! no external access possible
  ! short description of the manager
  CHARACTER(STRLEN_MEDIUM) :: label = ''
  ! initial date at pos=0
  TYPE (time_days)          :: start_date
  ! manager state for access control
  LOGICAL :: init           = .FALSE.
  ! lock/unlock the manager
  LOGICAL :: freeze         = .FALSE.
  ! present step of the manager
  INTEGER :: pos            = 0
  ! time interval in seconds
  REAL(dp) :: delta_time    = 0._dp
END TYPE time_manager

```

label is the name of the `time_manager`, and `start_date` is a Fortran95 structure (section 2.2.1), which provides the date (day and time of day) of the simulation start. The LOGICAL `init` indicates whether the manager is already initialised, whereas `freeze` indicates, whether the manager is locked, i.e., whether the time manager is protected from further modifications. As long as the LOGICAL `freeze` is `.FALSE.`, the contents of the time manager might be changed. Freezing the time manager prevents it of unintended changes. Internally the manager counts steps. The respective counter is `pos`; `pos=0` indicates the start of the simulation, i.e., at `start_date`. The length (in seconds) of one step is stored in `delta_time`. For the base model, this is usually the model time step length. The manager is initialised with the fivefold overloaded subroutine `manager_init`. It comprises the possibilities to

- a) initialise the `time_manager` by specifying the label and the `start_date` (`manager_init_days`),
- b) re-initialise the `time_manager` by specifying a new `start_date` provoking an adjustment of `pos` (`manager_reinit_days`),
- c) re-initialise the `time_manager` by specifying a new time increment `delta_time` provoking an adjustment of `start_date` (`manager_reinit_incr`),
- d) re-position the `time_manager` by specifying an offset to `pos` (`manager_step`),
- e) lock/unlock the `time_manager` by specifying the respective LOGICAL (`.TRUE.` to lock the manager, `.FALSE.` to unlock it) (`manager_freeze`).

With the subroutine `timer_rewind_manager` the `time_manager` will be set to a new date. This can be achieved in two ways. First, the manager is rewind without changing the `start_date`. This is only possible, when the new date is later than the `start_date`. In this case the manager position `pos` will be adjusted. The second method is to keep the position and the time interval, but to change the `start_date`.

The subroutine `manager_print` prints the status of the manager to the standard output.

The state of the `time_manager` can be inquired using the subroutine `manager_state`. Depending on the parameters, different information can be retrieved as listed in table 1.

## 3.2 The heart beat of the TIME MANAGER

The TIME MANAGER is initialised by the BMIL subroutine `messy_timer_init_manager` which calls among others the SMCL `manager_init`.

```

CALL manager_init(BM_time,'base model time',
                 start_date, timestep, m_text)

```

`BM_time` is of TYPE `time_manager` and thus the STRUCT containing all TIME MANAGER information. 'base model time' is the label of `BM_time`. `start_date` is the date at which the manager starts, `timestep` defines the STRUCT element `delta_time` of `BM_time` and `m_text` contains possible error output of the subroutine.

During the simulation the TIME MANAGER needs to be stepped forward at the very end of each model time step, thus starting the new one. This is done within the BMIL subroutine `messy_timer_reset_time`. Here the position of the `time_manager` is incremented by one. Afterwards, all dependent variables (e.g. dates and LOGICALS) are updated accordingly.

## 4 The EVENT MANAGER

The EVENT MANAGER schedules events which are discrete in time, such as the regular input and output of data, etc.

### 4.1 The definition of an event

An event is defined by the Fortran95 structure `time_event`

```

TYPE, PUBLIC :: time_event
  ! hold all event relevant information
  PRIVATE
  ! event state for access control
  LOGICAL :: init = .FALSE.
  ! event active true=on false=off
  LOGICAL :: active = .FALSE.
  ! increment between the action
  INTEGER :: count = 1
  ! offset (seconds)
  INTEGER :: offset = 0
  ! adjustment interval in seconds

```

Table 1: Versions of subroutine `|manager_state|`

| INPUT    | INPUT TYPE             | OUTPUT TYPE            | OUTPUT                   |
|----------|------------------------|------------------------|--------------------------|
| position | INTEGER                | <code>time_days</code> | corresponding date       |
| -        | -                      | <code>time_days</code> | the current date         |
| a date   | <code>time_days</code> | INTEGER                | nearest manager position |
| -        | -                      | REAL                   | <code>delta_time</code>  |
| -        | -                      | INTEGER                | <code>pos</code>         |

```

REAL(dp)  :: delta      = 2.0_dp
REAL(dp)  :: half_delta = 1.0_dp
! descriptive label of the event
CHARACTER(len=STRLEN_MEDIUM) :: &
  label = ''
!
! name of the basic units
CHARACTER(len=STRLEN_SHORT)  :: &
  unit  = TIME_INC_SECONDS
CHARACTER(len=STRLEN_SHORT)  :: &
  adjust = TRIG_EXACT ! type of triggering
!
! initial data for event
TYPE (time_days)  ::      initial_date
! without offset
TYPE (time_days)  ::      cycle_date
! previous trigger date
TYPE (time_days)  :: previous_trigger
! current trigger date
TYPE (time_days)  :: current_trigger
! next trigger date
TYPE (time_days)  ::      next_trigger

END TYPE time_event

```

with the components as follows:

- `initial_date` (of TYPE `time_days`) is the date of the event initialisation.
- `init` is a LOGICAL indicating whether the event is initialised.
- `active` is a LOGICAL indicating whether the event is active. An event can be defined / initialised but inactive. An inactive event will not trigger any action even if a trigger date is reached.
- `unit` is the unit in which the event is defined (either 'years', 'months', 'days', 'hours', 'minutes', 'seconds' or 'steps').
- `count` is an INTEGER increment between two dates at which the event is triggered; the increment is given in the unit specified by `unit`.
- `delta` / `half_delta` are intervals in seconds required for the internal calculation of the adjustment within the given interval.

- `label` is an unambiguous identifier ("name") of the event which should be as descriptive as possible.
- `offset` is an INTEGER offset in seconds between the event defined `count` and `unit` and "real" event. E.g., the event is defined for each full hour, but it should always happen at 10 minutes past the full hour. In this case the offset would be 600 (seconds). Note: the event defined by `count` and `unit` has to match full model time steps., i.e. `count` times the seconds equivalent to the unit must be a multiple of `delta_time`. With `offset` it is possible to schedule an event not exactly matching the time interval. Note: it is not allowed to define an `offset` for the units 'years' and 'months'.
- `adjust` is set to one of 'first', 'last', 'exact' or 'off'. In case of 'off' the event is deactivated and will not be triggered at all. The effect of the other three strings depends on the chosen `unit`. 'exact' schedules the event in the time step where the trigger is located. 'first' locates the event in the first time step after crossing the given date, whereas 'last' triggers the event in the last time step before the actual event date. Examples:

- 2, 'hours', 'first', 0 triggers the event exactly at 2:00, 4:00, 6:00 etc..
- The 'exact' label triggers at the same time as the label 'first', if the `offset` is zero.
- 2, 'hours', 'last', 0 triggers one time step before 'first' and 'exact' become true. In this example, assuming a time step of 10 minutes, the event would be triggered at 1:50, 3:50, 5:50, etc..

Note: The effect of the adjustment only comes into action when the `unit` is 'hours' or larger ('days', 'months', 'years'). For 'steps', 'seconds' and 'minutes' there is only an effect if the offset is neither a multiple of `delta_time` nor zero. Otherwise the events are triggered as if the adjustment would have been 'exact'. This leads to the effect, that 120, 'minutes', 'last', 0 triggers the event at different times as 2, 'hours', 'last', 0.

Only if the offset causes the event to lie in between two model time steps, the three `adjust` strings apart from 'off' get a meaning for all units smaller than

'hours'. 'first' and 'last' adjust to the respective unit. I.e., 'first' rounds the seconds down to the current full count of `unit`, whereas 'last' adjusts to the last count of `unit`. E.g., if the model time step is 2 minutes:

- The event is initialised via 10, 'minutes', 'adjust', 300 i.e., the offset is 5 minutes (i.e. exact in the middle of two time steps). Then 'exact' and 'first' will cause the event to be triggered at 6 minutes, 16 minutes and so on, whereas the 'last' adjustment results in a trigger after 4 minutes, 14 minutes etc.
  - The event is initialised via 10, 'minutes', 'adjust', 290. Then 'first' and 'last' will cause the event to be triggered at 6 minutes, 16 minutes and so on, whereas the 'exact' adjustment results in a trigger after 4 minutes, 14 minutes etc.
  - The event is initialised via 10, 'minutes', 'adjust', 240. Then 'first', 'exact' and 'last' will all cause the event to be triggered after 4 minutes, 14 minutes etc.
  - The event is initialised via 10, 'minutes', 'adjust', -290. Then 'first', 'exact' and 'last' will all cause the event to be triggered after 6 minutes, 16 minutes etc.
- `previous_trigger` is the date in `time_days` format at which the event was triggered last time.
  - `current_trigger` is the date in `time_days` format at which the event is triggered next (or now).
  - `next_trigger` is the date in `time_days` format at which the event will be triggered next after `current_trigger`.
  - `cycle_date` is the event date in `time_days` format without the offset. E.g. an event is defined for each full hour and an offset of 600 seconds. Thus the `cycle_date` would be the full hour whereas the `current_trigger` would be five minutes past the full hour.

## 4.2 How to define an event?

An event is defined by four elements:

- `counter` is an `INTEGER` defining the time interval (in units specified by `unit`) at which the event is triggered.
- `unit` is the unit of the time interval for the trigger (either 'years', 'months', 'days', 'hours', 'minutes', 'seconds' or 'steps')

- `adjustment` is an adjustment within the time interval (either 'first', 'last', 'exact' or 'off', see above).
- `offset` is an `INTEGER` offset in seconds between the event and the `initial_date` of the event.

These four parameters are combined in the Fortran95 structure `io_time_event`:

```
! structures
TYPE, PUBLIC :: io_time_event
! external given event properties
! - No. of steps in given unit
INTEGER      :: counter      = 0
! - counter unit type
CHARACTER(len=STRLEN_SHORT) :: &
    unit = TIME_INC_SECONDS
! - adjustment inside the unit
CHARACTER(len=STRLEN_SHORT) :: &
    adjustment = TRIG_EXACT
! - offset to initial date in seconds
INTEGER      :: offset      = 0
END TYPE io_time_event
```

With this, an event can be specified within a namelist, for instance

```
EXAMPLE_EVENT = 3, 'hours', 'last', 0
```

which determines `counter`, `unit`, `adjustment`, `offset`. In this example the event will be triggered within every three hours (`counter=3, unit='hours'`). No offset is requested (0). The `adjustment='last'` causes the event to be triggered in the time step before the 3 hours are reached. Note: The offset is in seconds and not in the unit given by `unit`.

These four variables must be defined (either by a namelist entry or within the code) and a variable of `TYPE io_time_event` must be initialized with these values. When the `io_time_event` is initialised by namelist in a parallel environment, the information must be broadcasted from the namelist reading process to all other processes. This is achieved with the subroutine `p_bcast_event` (`messy_main.timer.bi.f90`).

The event itself is initialised by calling the BMIL subroutine `timer_event_init`. Within this subroutine the event is tested (in subroutine `event_eval`) for valid values and is defined afterwards by the SMCL subroutine `event_init`. The subroutine `timer_event_init` requires as input:

- a variable of `TYPE time_event`,
- a variable of `TYPE io_time_event` with the event settings,
- the name of the event (i.e., the `label`), and

- a CHARACTER label (`eval_date`) indicating the evaluation date.

`eval_date` indicates if the event will be evaluated with the present date (i.e., the date of the current time step, `EV_TLEV_PRES`), with the `next_date` (the date of the next time step, `EV_TLEV_NEXT`) or with the `previous_date` (the date of the last time step, `EV_TLEV_PREV`). The CHARACTER PARAMETERS `EV_TLEV_PRES`, `EV_TLEV_NEXT` and `EV_TLEV_PREV` are defined as 'present', 'next' and 'previous', respectively. Note: The `eval_date` must always correspond to the date with which the event is tested later on (call of `event_state`). If `event_state` is called with `current_date` `eval_date` must be `EV_TLEV_PRES` for `next_date` it must be `EV_TLEV_NEXT` and if `event_state` is called with `previous_date` the `eval_date` should be `EV_TLEV_PREV`.

### 4.3 How to inquire an event?

For each of the state variables defined within the Fortran95 structure `time_event` a function exists providing the respective information:

- `event_is_init`
- `event_is_active`
- `event_count`
- `event_offset`
- `event_delta`
- `event_half_delta`
- `event_label`
- `event_adjust`
- `event_unit`

In addition, subroutines are defined to provide the respective dates:

- `event_initial_date`
- `event_cycle_date`
- `event_previous_date`
- `event_current_date`
- `event_next_date`

Depending on the input, the overloaded subroutine `event_state` provides

- the interval between the previous and the current trigger as number of steps of unit `unit`,

- the time interval between the previous and the current trigger as number of seconds, or
- the time interval between the current and the next trigger as number of seconds.
- a LOGICAL which is `.TRUE.` if the event should be triggered this time step.

### 4.4 The restart event

A specific event is the restart (or rerun) event, a pre-defined `time_event` labeled "rerun\_event".

If this event is triggered, the status of the model is dumped with full precision to restart files and - depending on the number of cycles - the simulation is interrupted. The restart files are then used to continue the model simulation.

Note: the LOGICALS `l_rerun` and `lbreak` (see Sect. 2.2.2) and the variable `no_cycles` (see Sect. 2.2.3) gain together a rather complex meaning: `l_rerun` is the result of the function `event_state`. If `.TRUE.` restart files will be written. This itself does not imply any consequences for the continuation of the model simulation. But, each time restart files are written the counter of `cycles` will be increased by 1. When the number of maximal cycles (`no_cycles`) given in the namelist is reached, the LOGICAL `lbreak` will be set `.TRUE.` and as consequence the simulation will be interrupted.

There are two ways of defining the `rerun_event`. Either it can be initialised from the settings of the basemodel or it is defined within the timer namelist. The second is the more appropriate way, but to keep the full functionality of the basemodel it might be desirable to use the timing of the basemodel. If the restart event is determined by the basemodel, the subroutine `timer_set_rerun_event` must be called. The information required from the basemodel are: The four components of the `io_time_event` and the string indicating, if the evaluation of the event will be performed with the present or the next date. For setting the restart event via namelist see Section 5.

### 4.5 Subroutines used internally

- `event_init` is called by `timer_event_init`. Within this subroutine the variables contained in the Fortran95 structure `time_event` are tested for consistency and the event is initialised.
- `event_reinit` re-initialises an event in the way that the current and the next trigger date are reset to the date given as parameter. This works only for dates later than the current date.
- `print_event_name` writes the event name to standard output.

- `convert_steps2unit` converts the counter which is defined in steps into a counter for the new unit `unit`.
- `get_next_trigger` resets the event trigger after an event was triggered. This subroutine contains the subroutine `get_next_date`.
- `adjust_date` adjusts the interval to the date according to the event element `adjust`.
- `event_print` prints the triggers and the initialisation information of an event.

## 5 The TIMER namelist

The time control of a model simulation is defined in the CPL namelist of `TIMER` in `timer.nml` (see Fig. 2).

- `CAL_TYPE` is an `INTEGER` determining the applied calendar. It can be either the Julian calendar (0), or a climatological calendar using a 360 day year (1). NOTE: the 360 day year calendar was implemented but never tested thoroughly. Be careful in using option 1.
- `MODEL_START` is an `INTEGER` array containing the 6 date components of the start date. Within MESSy they will be usually set in the run-script and exportet to the namelist via the shell variables `$START_YEAR`, `$START_MONTH`, `$START_DAY`, `$START_HOUR`.
- `MODEL_STOP` is an `INTEGER` array containing the 6 date components of the stop date. Within MESSy they will be usually set in the run-script and exportet to the namelist via the shell variables `$STOP_YEAR`, `$STOP_MONTH`, `$STOP_DAY` and `$STOP_HOUR`.
- `lresume` is `.TRUE.` in case of a model restart. It is also set automatically by the run-script.
- `IO_RERUN_EV` determines the restart event. It is of the TYPE `io_rerun_event`.
- `LABORT` prevents (if `.TRUE.`) that after a model break the next job is submitted to the scheduler of the computer.
- `no_cycles` defines the number of rerun cycles after which the model simulation is interrupted (see Sect. 2.2.3).
- `delta_time` is the model time step used in the simulation.

## 6 The TIMER BMIL ROUTINES

Within the timeflow of a model simulation the following `TIMER` BMIL routines must be called to operate the `TIMER`:

- `main_timer_setup(flag)` should be called as early as possible within the initialisation phase. For `flag=1` the `TIMER` namelist is read via `main_timer_read_nml_cpl` and broadcasted to all CPUs. Furthermore the `LOGICAL lstart` and `lfirst_cycle` are set. For `flag=2` `start_date` and `stop_date` are set according to the namelist (if not yet initialised) and the `io_rerun_event` will be defined from the namelist and broadcasted. Additionally the first `TIME MANAGER` initialisation takes part here.

Note: the separation of `main_timer_setup` into two parts is required to enable the `TIMER` to be initialised by the basemodel instead of the timer namelist.

- `main_timer_initialize` is called from `messy_initialize`. First, within the internal subroutine `init_BM_time` the `TIMER` variables `previous_date`, `next_date`, `current_date`, `start_date` and `time_step_len` are initialised or updated, respectively. Additionally, the variable `current_time_step` and the date components for the `start_date` `YEAR_START`, `MONTH_START`, `DAY_START`, `HOURL_START`, `MINUTE_START`, `SECOND_START` are initialised. Only in case of a start of a model simulation (`lstart = .TRUE.`, i.e., no restart), the date components of the `current_date` (`YEAR`, `MONTH`, `DAY`, `HOURL`, `MINUTE`, `SECOND`) are set in this subroutine. Finally, the restart event is defined by the subroutine `timer_event_init`.
- `main_timer_global_start` First the `rerun_event` is evaluated and the `LOGICAL l_rerun` is set. Secondly, the `next_date` is evaluated according to the `stop_date`. When the `stop_date` will be reached in the following time step, the `LOGICAL lstop` is set `.TRUE.`. In this case the `LOGICALS l_rerun` and `L_TRIGGER_RESTART` will also be set `.TRUE.`. Thirdly, `lbreak` will be set dependent on `l_rerun`, `no_cycles` and `L_TRIGGER_RESTART`. At the end the date components `YEAR`, `MONTH`, `DAY`, `HOURL`, `MINUTE`, `SECOND` and `YEAR_NEXT`, `MONTH_NEXT`, `DAY_NEXT`, `HOURL_NEXT`, `MINUTE_NEXT`, `SECOND_NEXT` are reset.
- `messy_timer_reset_time` The position of the `TIME MANAGER` is incremented by one and the dates (`previous_date`, `next_date`, `current_date`) updated accordingly. Additionally the `LOGICALS lstart`, `lresume` and `lfirst_cycle` are set to `.FALSE.`

```

! -- f90 --
&CPL
CAL_TYPE      = 0,  !# 0: julian calendar
                !# 1: 360 day year
!
!# automatically set by run-script; do not change
MODEL_START = $START_YEAR,$START_MONTH,$START_DAY,$START_HOUR,0,0,
MODEL_STOP  = $STOP_YEAR, $STOP_MONTH, $STOP_DAY, $STOP_HOUR,0,0,
lresume     = $ESH_LRESUME,
!
!# trigger restart at this time interval
IO_RERUN_EV = 1,'months','last',0,
no_cycles   = 2,                ! restart cycles without break
LABORT      = F,                ! abort after first cycle in any case
!
!# set model time step here; if undefined it is automatically set by the
!# basemodel (ECHAM5 only!)
delta_time  = 600,              ! in seconds
!
/

```

Figure 2: The CPL namelist of TIMER in `timer.nml`

## References

- Jöckel, P., Sander, R., Kerkweg, A., Tost, H., and Lelieveld, J.: Technical Note: The Modular Earth Sub-model System (MESSy) - a new approach towards Earth System Modeling, *Atmos. Chem. Phys.*, 5, 433–444, <http://www.atmos-chem-phys.net/8/1677/>, 2005.
- Roeckner, E., Bäuml, G., Bonaventura, L., Brokopf, R., Esch, M., Giorgetta, M., Hagemann, S., Kirchner, I., Kornblüeh, L., Manzini, E., Rhodin, A., Schlese, U., Schulzweida, U., and Tompkins, A.: The atmospheric general circulation model ECHAM5. PART I: Model description, Tech. rep., Max Planck Institute for Meteorology, MPI-Report 349, [http://www.mpimet.mpg.de/fileadmin/publikationen/Reports/max\\_scirep\\_349.pdf](http://www.mpimet.mpg.de/fileadmin/publikationen/Reports/max_scirep_349.pdf), 2003.
- Roeckner, E., Brokopf, R., Esch, M., Giorgetta, M., Hagemann, S., Kornblüeh, L., Manzini, E., Schlese, U., and Schulzweida, U.: The atmospheric general circulation model ECHAM5. PART II: Sensitivity of Simulated Climate to Horizontal and Vertical Resolution, Tech. rep., Max Planck Institute for Meteorology, MPI-Report 354, [http://www.mpimet.mpg.de/fileadmin/publikationen/Reports/max\\_scirep\\_354.pdf](http://www.mpimet.mpg.de/fileadmin/publikationen/Reports/max_scirep_354.pdf), 2004.
- Roeckner, E., Brokopf, R., Esch, M., Giorgetta, M., Hagemann, S., Kornblüeh, L., Manzini, E., Schlese, U., and Schulzweida, U.: Sensitivity of simulated climate to horizontal and vertical resolution in the ECHAM5 atmosphere model, *J. Climate*, 19, 3771–3791, 2006.
